# Flaws in Data Binning for Population Receptive Field Analyses

Susanne Stoll\*<sup>1</sup>, Elisa Infanti<sup>1</sup>, Benjamin de Haas<sup>2</sup>, and D. Samuel  
Schwarzkopf<sup>1,3</sup>

<sup>1</sup>University College London | United Kingdom

<sup>2</sup>Justus-Liebig-Universität Gießen | Germany

<sup>3</sup>The University of Auckland | New Zealand

## Abstract

Data binning can cope with overplotting and noise, making it a versatile tool for comparing many observations. However, it goes awry if the same observations are used for *binning* and *contrasting*. This creates an inherent circularity, leaving noise and *regression to the mean* insufficiently controlled. Here, we use population receptive field analyses – where data binning is commonplace – as an example to expose this flaw through simulations and empirical repeat data.

## 1 Main text

2 Data binning is often applied to large data sets in order to prevent overplotting  
3 and control noise. As such, it has become commonplace in population receptive  
4 field (pRF) modeling ([Dumoulin & Knapen, 2018](#); [Dumoulin & Wandell, 2008](#)),

---

\*Corresponding author | Email address: [stollsus@gmail.com](mailto:stollsus@gmail.com) (Susanne Stoll)

5 where researchers are commonly interested in comparing visual field maps with  
6 thousands of observations between different (experimental) conditions. However,  
7 pRF modeling is only one out of several research areas where some form of differential  
8 data binning has been adopted, such as psychology ([Gignac & Zajenkowski, 2020](#);  
9 [Holmes, 2009](#); [Preacher, MacCallum, Rucker, & Nicewander, 2005](#); [Shanks, 2017](#)),  
10 systems neuroscience ([Holmes, 2009](#); [Kriegeskorte, Simmons, Bellgowan, & Baker,](#)  
11 [2009](#)), epidemiology ([Barnett, van der Pols, & Dobson, 2005](#)), and presumably many  
12 more.

13 Although differential data binning can help us see an overall pattern in the face  
14 of an abundance of details, it goes awry if the same noisy observations are used for  
15 *binning* (selection) and *contrasting* (selective analysis). This is because dipping into  
16 noisy data more than once violates assumptions of independence, favoring some noise  
17 components over others, and eventually biasing descriptive and inferential statistics  
18 ([Kriegeskorte et al., 2009](#)). As such, double-dipping in differential data binning  
19 prevents us from – amongst other things – controlling for *regression to the mean*  
20 (e.g., [Galton, 1886](#); [Gignac & Zajenkowski, 2020](#); [Holmes, 2009](#); [Makin & De Xivry,](#)  
21 [2019](#); [Shanks, 2017](#)). Regression to the mean is a statistical phenomenon operating  
22 when two variables are imperfectly correlated (e.g., due to random noise). In this  
23 case, extreme observations for one variable will on average be less extreme (closer to  
24 the mean) for the other variable ([Campbell & Kenny, 1999](#); [Cohen, Cohen, West,](#)  
25 [& Aiken, 2003](#); [Shanks, 2017](#))<sup>1</sup>. The magnitude of regression to the mean tends to  
26 be higher the lower the correlation between the variables.

27 Regression to the mean and/or double-dipping are of particular concern in what  
28 is better known as *post hoc subgrouping* ([Preacher et al., 2005](#)), *post hoc data se-*  
29 *lection* ([Shanks, 2017](#)), and *extreme groups approach* ([Preacher et al., 2005](#)), all of  
30 which can be considered as subtypes of data binning. Post hoc subgrouping refers  
31 to collecting two measures, defining extreme subgroups post hoc using one measure  
32 (e.g., the lower and upper quantile), and then performing statistics on these mea-

---

<sup>1</sup>To be precise, regression to the mean refers to standard scores (*z*-scores; [Campbell & Kenny, 1999](#); [Kenny, 2005](#)).

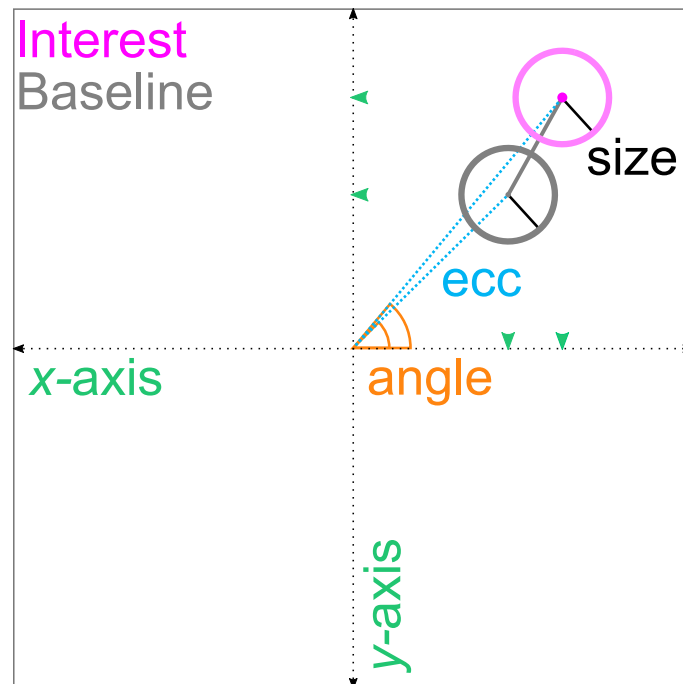

**Figure 1. Population receptive field estimates.** The two circles represent a pRF that changes its position (gray solid line) in an Interest (magenta) compared to a Baseline (gray) condition. The black solid square represents a cutout of the visual field and the black dashed arrows a Cartesian coordinate system. The pRF was modeled as a 2D Gaussian function. The center of the 2D Gaussian (tiny gray dot and small magenta dot) represents the position of the pRF. pRF position can be expressed in terms of  $x_0$  and  $y_0$  coordinates (green arrow heads) or eccentricity (blue dashed line) and polar angles (orange solid line). Eccentricity corresponds to the Euclidean distance between the center of gaze (origin) and the center of the 2D Gaussian. Polar angle corresponds to the counter-clockwise angle running from the positive  $x$ -axis to the eccentricity vector. The standard deviation of the Gaussian ( $1\sigma$ ; black solid line) represents pRF size. Both pRF position and size are typically expressed in degrees of visual angle. Polar angles are typically expressed in degrees. Ecc = eccentricity. pRF = population receptive field.

33 sures for the extreme subgroups (Preacher et al., 2005). Post hoc data selection  
34 is similar but involves only one extreme subgroup (Shanks, 2017). Both of these  
35 practices are different from the extreme groups approach, where extreme subgroups  
36 are selected a priori based on one measure; that is, without collecting the whole  
37 range of the other measure (Preacher et al., 2005). Here, we focus on a post hoc  
38 scenario where essentially all subgroups are considered, not just the extreme ones  
39 (see also Gignac & Zajenkowski, 2020; Holmes, 2009). We label this procedure *post*  
40 *hoc binning analysis*.

41 Imagine we conduct a retinotopic mapping experiment (Dumoulin & Wandell,

42 2008), where we estimate pRF position and size for each voxel in the brain under  
43 a *Baseline* condition as well as a condition of *Interest* (see [Figure 1](#) for a single  
44 pRF). We can think of the Interest and Baseline conditions as repeat data (e.g.,  
45 [Benson et al., 2018](#); [van Dijk, de Haas, Moutsiana, & Schwarzkopf, 2016](#)), different  
46 attention conditions (e.g., [de Haas, Schwarzkopf, Anderson, & Rees, 2014](#); [Klein,](#)  
47 [Harvey, & Dumoulin, 2014](#); [van Es, Theeuwes, & Knapen, 2018](#); [Vo, Sprague, &](#)  
48 [Serences, 2017](#)), mapping sequences (e.g., [Binda, Thomas, Boynton, & Fine, 2013](#);  
49 [Infanti & Schwarzkopf, 2020](#)), mapping stimuli (e.g., [Alvarez, de Haas, Clark, Rees,](#)  
50 [& Samuel Schwarzkopf, 2015](#); [Binda et al., 2013](#); [Le, Witthoft, Ben-Shachar, &](#)  
51 [Wandell, 2017](#); [Yildirim, Carvalho, & Cornelissen, 2018](#)), scotoma conditions (e.g.,  
52 [Barton & Brewer, 2015](#); [Binda et al., 2013](#); [Haak, Cornelissen, & Morland, 2012](#);  
53 [Prabhakaran et al., 2020](#)), pRF modeling techniques (e.g., [Carvalho et al., 2020](#)) or  
54 uni- and multisensory conditions ([Holmes, 2009](#)) – to name but a few examples. As  
55 a pRF model, we adopt a 2D Gaussian, where pRF position represents the center of  
56 a pRF in visual space (the center of the Gaussian) and pRF size its spatial extent  
57 (the standard deviation of the Gaussian; see [Figure 1](#)). We then fit this model to  
58 the voxel-wise brain responses we measured in the retinotopic mapping experiment  
59 ([Dumoulin & Wandell, 2008](#)). To compare pRF positions in the Interest and Baseline  
60 condition voxel-by-voxel, we bin the pRF positions from both conditions according  
61 to the pRF positions from the Baseline condition. Subsequently, we quantify for each  
62 voxel the position shift from the Baseline to the Interest condition (see [Figure 1](#) for  
63 a single pRF). Finally, we calculate the bin-wise mean shift. This is conceptually  
64 equivalent to calculating the bin-wise simple means for each condition and comparing  
65 them subsequently, be it descriptively or inferentially.

66 Either way, by adopting such a post hoc binning analysis, we essentially assume  
67 that the mean pRF position we quantify for each bin in the Baseline condition  
68 approximates the true mean pRF position. In particular, we presuppose that binning  
69 voxels according to pRF positions from the Baseline condition and aggregating them  
70 subsequently for this condition ensures that bin-wise noise components cancel out  
71 on average (see also [Shanks, 2017](#)). This, however, is not the case.

72 To illustrate this flaw, we generated a simplified contrast scenario with a null ef-

## A. Simulated null effect

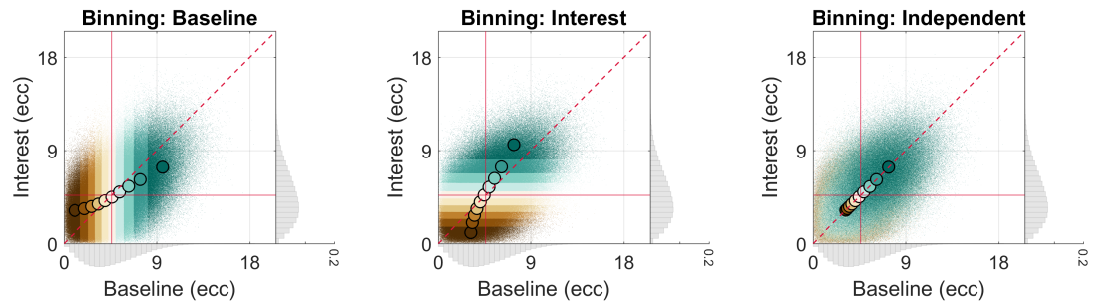

## B. Errors

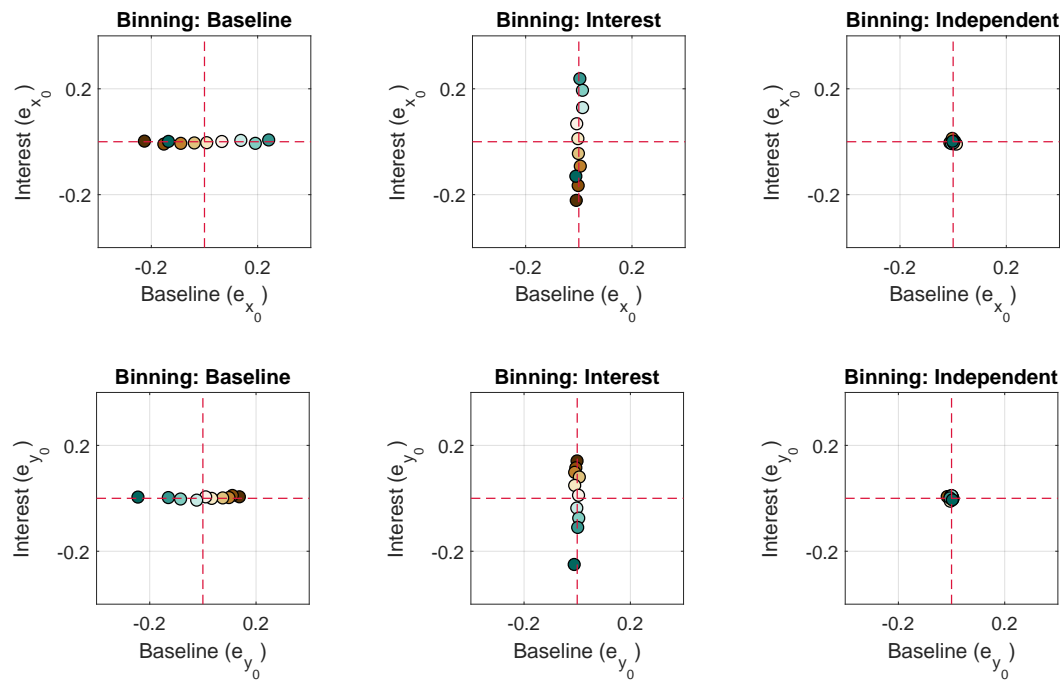

**Figure 2. Simulated 1D post hoc binning analysis on eccentricity | Null effect.** **A.** Bin-wise eccentricity values and means in the Interest and Baseline condition for a simulated null effect and different data binning scenarios. Eccentricity values in the Baseline and Interest condition were either binned according to eccentricity values in the Baseline (1<sup>st</sup> column), Interest (2<sup>nd</sup> column), or an Independent condition (equivalent to repeat data of the Baseline condition; 3<sup>rd</sup> column). The gray marginal histograms (bin width = 0.5 dva;  $y$ -axis: relative frequency) show the simulated eccentricity distributions for each condition, obtained by repeatedly disturbing the  $x_0$  and  $y_0$  values of an empirical visual field map with random Gaussian noise ( $sd = 2$  dva) and subsequently converting them to eccentricity values. Note that the range of the marginal  $y$ -axis is the same for all histograms. The red crosshair indicates the location of the overall mean for the Interest and Baseline condition. The red dashed line corresponds to the identity line. **B.** Bin-wise mean errors for the  $x_0$  and  $y_0$  values in the Interest and Baseline condition for the same binning scenarios as in A. The dashed red lines reflect the zero error line. Dark brown colors correspond to lower and dark blue-green colors to higher decile bins. The maximal eccentricity of the stimulated visual field area subtended 8.5 dva. Dva = Degrees of visual angle. Ecc = Eccentricity.

73 fect. In particular, we used random Gaussian noise to repeatedly disturb voxel-wise  
74  $x_0$  and  $y_0$  coordinates (Figure 1) of a V1 visual field map from a single participant  
75 ( $N_{repeat} = 200$ ;  $sd_{noise} = 2$  degrees of visual angle, dva). We did this twice to gener-  
76 ate a Baseline and an Interest condition. We then converted the voxel-wise  $x_0$  and  
77  $y_0$  samples to eccentricity values (Figure 1), as is often done in the pRF literature  
78 (see Figure 1-figure supplement 1 for interpretational difficulties with eccentricity  
79 when it comes to position shifts). This resulted in a gamma-like eccentricity dis-  
80 tribution. Lastly, we binned the eccentricity values in both conditions according  
81 to the eccentricity values in the Baseline condition using deciles and calculated the  
82 bin-wise means for each condition<sup>2</sup>.

83 We plotted the bin-wise eccentricity means in the Baseline and Interest condi-  
84 tion against one another along with individual observations per bin and marginal  
85 histograms (bin width = 0.5 dva) reflecting the simulated distributions<sup>3</sup> (Figure 2,  
86 A., 1<sup>st</sup> column). Importantly, since there was no true difference between conditions,  
87 the bin-wise means should lie on the identity line. Contrary to this prediction, the  
88 bin-wise means systematically diverged from the identity line. Strikingly, when us-  
89 ing the Interest instead of the Baseline condition for binning, the systematic pattern  
90 of divergence flipped (Figure 2, A., 2<sup>nd</sup> column). This bidirectionality is a typical  
91 sign of regression to the mean (Campbell & Kenny, 1999; Shanks, 2017) and due  
92 to circularity that leads to asymmetric bins (see bin-wise ranges of observations for  
93 Baseline and Interest, Figure 2, A., 1<sup>st</sup> and 2<sup>nd</sup> columns) and biases bin-wise noise  
94 components. In particular, for the condition that was used for contrasting and bin-  
95 ning (henceforth *circular* condition), the bin-wise noise components of the  $x_0$  and  
96  $y_0$  values were skewed on average. For the other condition (henceforth *non-circular*  
97 condition), however, the bin-wise noise components cancelled out on average (Fig-

---

<sup>2</sup>Note that when evaluating data distributions with unequal means, variances, or non-linearity,  $z$ -standardization might be necessary to detect regression to or away from the mean (Campbell & Kenny, 1999; Shanks, 2017). In particular,  $z$ -standardization makes data distributions directly comparable. As such, bin-wise means should regress to wherever they intersect the identity line. Here, we always display data in native space, as this is typically done in the pRF literature. However, we use crosshairs to indicate the location of the mean and thus provide a visual guideline.

<sup>3</sup>Note that apart from the visualizations provided here, it might be beneficial to additionally look at Galton squeeze diagrams to detect regression to or away from the mean (Campbell & Kenny, 1999; Shanks, 2017).

98 [ure 2](#), B., 1<sup>st</sup> and 2<sup>nd</sup> columns).

99 The skew in average noise renders the bin-wise eccentricity means of the circular  
100 condition more extreme, especially for lower and higher decile bins. As a result,  
101 the bin-wise eccentricity means for the non-circular condition regress – by statistical  
102 necessity – to the overall mean<sup>4</sup> for this condition (red crosshair); that is, they are  
103 less extreme (see different ranges of bin-wise means for the circular and non-circular  
104 conditions in [Figure 2](#), A., 1<sup>st</sup> and 2<sup>nd</sup> columns). If the Interest condition is then  
105 contrasted to the Baseline condition, a mean increase in eccentricity for lower deciles  
106 and a mean decrease for higher deciles or vice versa occurs, depending on whether  
107 the data are binned on the Baseline or Interest condition ([Figure 2](#), A., 1<sup>st</sup> and 2<sup>nd</sup>  
108 column). This artifact arises because we did not use independent conditions for  
109 binning and contrasting; that is, conditions with independent noise components.

110 Importantly, how the artifact manifests can change when data are thresholded  
111 across conditions (i.e., corresponding observations are deleted in a pair-wise fashion;  
112 [Figure 2-figure supplement 1-2](#), A. and B., 1<sup>st</sup> and 2<sup>nd</sup> columns) and/or noise scales  
113 with eccentricity (heteroskedasticity; [Figure 2-figure supplement 3](#), A. and B., 1<sup>st</sup>  
114 and 2<sup>nd</sup> columns; see also [Holmes, 2009](#)). In fact, in the event of cross-thresholding,  
115 noise components are modified and might not necessarily cancel out for the non-  
116 circular condition ([Figure 2-figure supplement 1-2](#), B., 1<sup>st</sup> and 2<sup>nd</sup> columns). The  
117 case of eccentricity-scaled noise furthermore shows that the artifact can include some  
118 clear regression away from the mean<sup>5</sup> (egression; [Figure 2-figure supplement 3](#), A.,  
119 1<sup>st</sup> and 2<sup>nd</sup> columns; e.g., [Campbell & Kenny, 1999](#); [Schwarz & Reike, 2018](#)).

120 Condition cross-thresholding is common practice in the pRF literature where  
121 data are cleaned across conditions according to eccentricity, goodness-of-fit ( $R^2$ ),  
122 pRF size, missing data or other criteria from one or multiple conditions. Eccentricity-  
123 scaled noise is an equally likely scenario that might arise from fitting errors due to

---

<sup>4</sup>Note that for skewed distributions (such as the gamma-like distribution here), the regression effect might be actually towards the mode and away from the mean of the overall distribution ([Schwarz & Reike, 2018](#)). If the location of the overall mode and mean are sufficiently close, our visualizations would be unable to distinguish these two cases.

<sup>5</sup>Note that the regression was presumably towards the nearest modes of the simulated bimodal distribution (see marginal histograms in [Figure 2-figure supplement 3](#), A., 1<sup>st</sup> and 2<sup>nd</sup> columns; [Schwarz & Reike, 2018](#)).

Simulated null effect

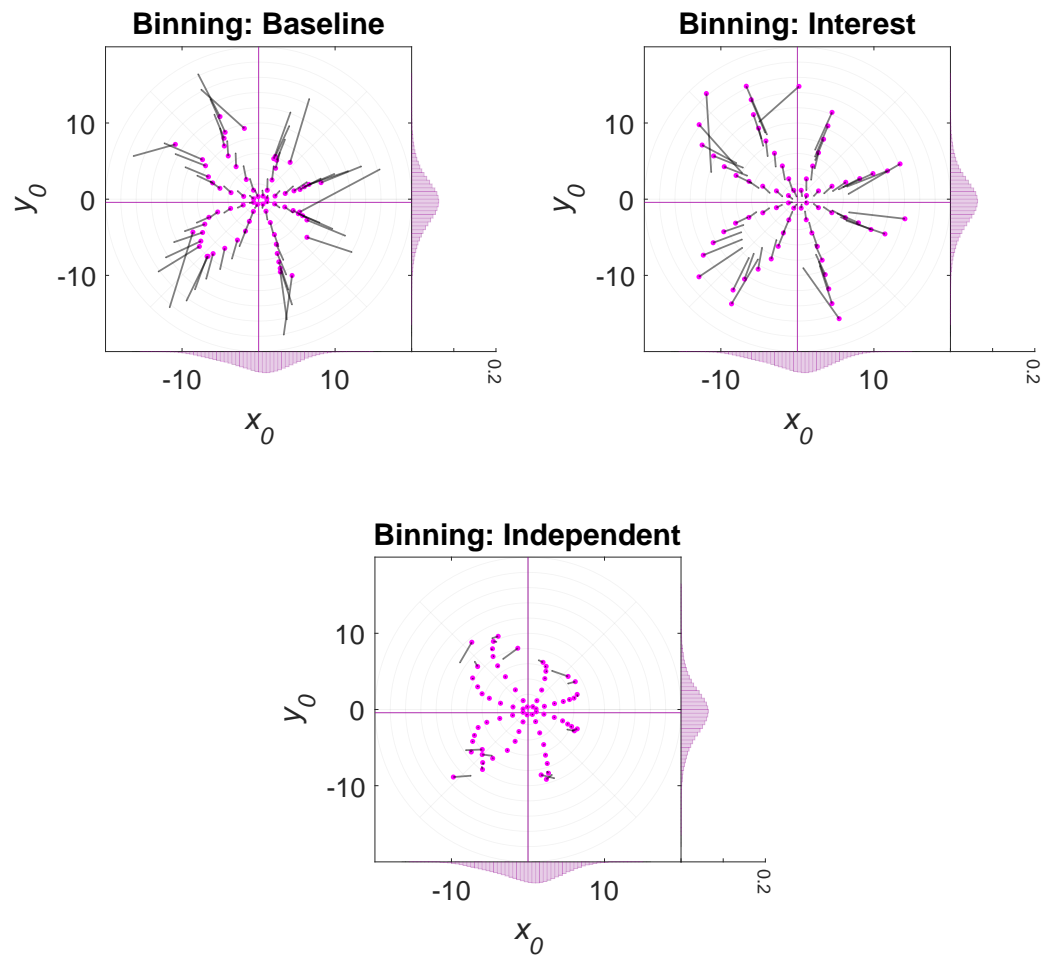

**Figure 3. Simulated 2D post hoc binning analysis on  $x_0$  and  $y_0$  | Null effect.** Bin-wise  $x_0$  and  $y_0$  means in the Interest and Baseline condition for a simulated null effect and different data binning scenarios.  $X_0$  and  $y_0$  values in the Baseline and Interest condition were either binned according to eccentricity and polar angle values in the Baseline (1<sup>st</sup> column, 1<sup>st</sup> row), Interest (2<sup>nd</sup> column, 1<sup>st</sup> row), or an Independent condition (equivalent to repeat data of the Baseline condition; 2<sup>nd</sup> row). The marginal histograms (bin width = 0.5 dva;  $y$ -axis: relative frequency) show the simulated  $x_0$  and  $y_0$  distributions for each condition, obtained by repeatedly disturbing the  $x_0$  and  $y_0$  values of an empirical visual field map with random Gaussian noise ( $sd = 2$  dva). Magenta histograms correspond to the Interest condition and gray histograms to the Baseline condition. Note that the range of the marginal  $y$ -axis is the same for all histograms. The large magenta dots (arrow tip) correspond to the means in the Interest condition and the tiny gray dots (arrow knock) to the means in the Baseline condition. The gray line (arrow shaft) depicts the shift from the Baseline to the Interest condition. The magenta crosshair indicates the location of the overall  $x_0$  and  $y_0$  means for the Interest condition and the gray crosshair the location of the overall means for the Baseline condition. Please note that if there is no systematic difference between the Baseline and Interest condition, the histograms and crosshairs coincide (as is the case here). The light gray radar grid demarks the bin segments. Polar angle bins ranged from 0° to 360° with a constant bin width of 45° and eccentricity bins from 0 to 20 dva with a constant bin width of 2 dva. The maximal eccentricity of the stimulated visual field area subtended 8.5 dva. Dva = Degrees of visual angle.



124 partial stimulation of pRFs (especially near the edge of the stimulated mapping  
125 area), higher variability in pRF position estimates for wider pRFs as well as fluctu-  
126 ations in the signal-to-noise ratio of brain responses due to central fixation and/or  
127 manipulating attention across visual space<sup>6</sup>.

128 The artifact also replicated when simulating a true effect (i.e., a radial shift of 2  
129 dva in the Interest condition; [Figure 2-figure supplement 4](#), A. and B., 1<sup>st</sup> and 2<sup>nd</sup>  
130 columns). The same was true for equidistant binning ([Figure 2-figure supplement 5](#),  
131 A. and B., 1<sup>st</sup> and 2<sup>nd</sup> columns), which is frequently applied in the pRF literature.  
132 However, unlike decile binning, equidistant binning resulted in a lower number of  
133 observations for higher equidistant bins (due to the gamma-like eccentricity distri-  
134 bution; [Figure 2-figure supplement 5](#), A., 1<sup>st</sup> and 2<sup>nd</sup> columns). Consequently, for  
135 higher equidistant bins, the skew in average noise for the circular condition was  
136 generally larger here. Similarly, for higher equidistant bins, noise components did  
137 not always cancel out for the non-circular condition (see all [Figure 2-figure supple-](#)  
138 [ment 5](#), B., 1<sup>st</sup> and 2<sup>nd</sup> columns). This is because for random noise to cancel out on  
139 average, the number of observations needs to be sufficiently large.

140 For all presented simulation cases, the artifact likewise manifested for another  
141 kind of binning analysis, namely, when binning the  $x_0$  and  $y_0$  values according to  
142 both eccentricity and polar angle (i.e., 2D segments) and computing shift vectors  
143 ([Figure 1](#) as well as [Figure 3](#) and [Figure 3-figure supplement 1-4](#), 1<sup>st</sup> row). Here, the  
144 bin-wise means regressed towards and away from the overall means of the  $x_0$  and  $y_0$   
145 distribution.

146 Notably, for empirical repeat data from the Human Connectome Project ([Benson](#)  
147 [et al., 2018, 2020](#)), both kinds of binning analyses produced patterns consistent  
148 with the artifact ([Figure 4-5](#) and [Figure 4-figure supplement 1-3](#) and [Figure 5-figure](#)  
149 [supplement 1-3](#), A.-C.). This establishes its practical relevance. Moreover, some  
150 of us recently retracted an article on attention-induced differences in pRF position

---

<sup>6</sup>Note that floor/ceiling effects (due to physiological and methodological constraints on the minimum and maximum observable value) and/or the calculation of absolute (raw) vs proportional (%) differences are further factors influencing the artifact's appearance ([de Haas et al., 2014](#); [de Haas, Schwarzkopf, Anderson, & Rees, 2020](#); [Holmes, 2009](#)).

A. Empirical repeat data | 25<sup>th</sup> %ile | Dorsal

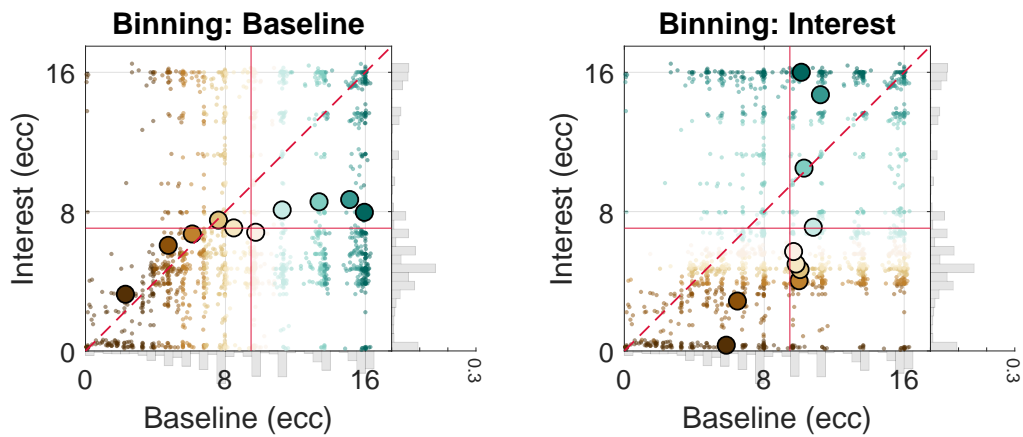

B. Empirical repeat data | 25<sup>th</sup> %ile | Dorsal – Cross-thresholding (Baseline)

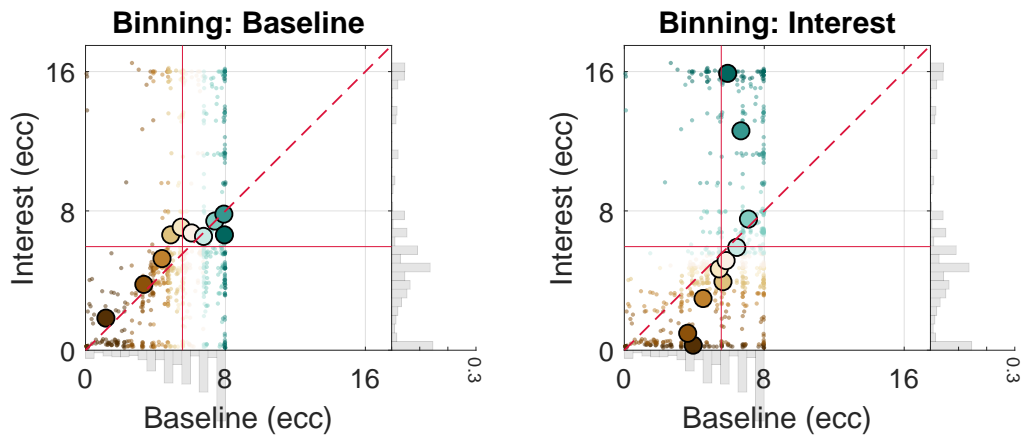

C. Empirical repeat data | 25<sup>th</sup> %ile | Dorsal – Cross-thresholding (Baseline and Interest)

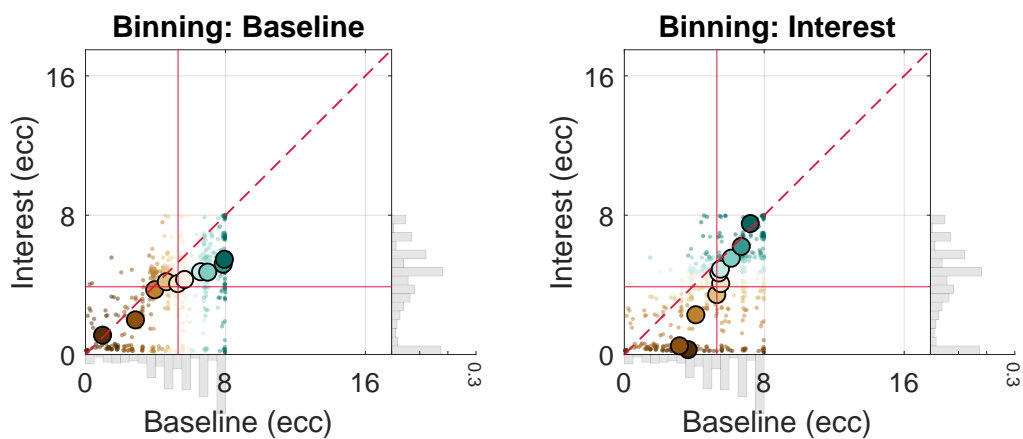

Figure 4. Caption on next page.

**Figure 4. Empirical 1D post hoc binning analysis on eccentricity | Repeat data | 25<sup>th</sup> %ile participant | Dorsal.** Bin-wise eccentricity values and means in the Interest and Baseline condition for repeat data from the HCP belonging to the 25<sup>th</sup> %ile participant of the median  $R^2$  distribution and different data binning scenarios. **A.** Data from the dorsal complex (V3A/B and IPS0–5) without condition cross-thresholding. **B.** Same as A., but with condition cross-thresholding. To this end, eccentricity values falling outside a certain eccentricity range ( $\geq 0$  and  $\leq 8$  dva) and below a certain  $R^2$  cut-off ( $\leq 2.2\%$ ) in the Baseline condition were removed from both conditions. **C.** Same as B., although here, condition cross-thresholding was based on both the Baseline and Interest condition. Eccentricity values in the Baseline and Interest condition were either binned according to eccentricity values in the Baseline (1<sup>st</sup> column in A.-C.) or Interest (2<sup>nd</sup> column in A.-C.) condition. The gray marginal histograms (bin width = 0.5 dva;  $y$ -axis: relative frequency) show the eccentricity distributions for each condition. Note that the range of the marginal  $y$ -axis is the same for all histograms. The red crosshair indicates the location of the overall mean for the Interest and Baseline condition. The red dashed line corresponds to the identity line. Dark brown colors correspond to lower and dark blue-green colors to higher decile bins. The maximal eccentricity of the stimulated visual field area subtended 8 dva. HCP = Human connectome project. Dva = Degrees of visual angle. Ecc = Eccentricity. %ile = percentile.

151 and size in V1-V3 (de Haas et al., 2014) because an in-house reanalysis suggested  
152 that post hoc binning along with condition cross-thresholding and heteroskedasticity  
153 yielded artifactual (or artifactually inflated) results in the form of regression from  
154 the mean (de Haas et al., 2020). In this case, the apparent significant effect was  
155 an increase in eccentricity and pRF size in the Interest vs Baseline condition for  
156 eccentricity bins in the middle of the tested range.

157 Taken together, the heterogeneity in manifestation we exposed here makes it  
158 hard to spot the artifact by visual inspection alone and highlights its dependency  
159 on exact distributional properties of the data at hand (see also Campbell & Kenny,  
160 1999; Holmes, 2009; Schwarz & Reike, 2018, for similar points).

161 How can we omit double-dipping and control for regression to the mean? We  
162 could, for instance, use an Independent condition for binning (such as repeat data or  
163 odd or even runs for the Baseline condition; Figure 2 and Figure 2-figure supplement  
164 1-5, A., 3<sup>rd</sup> column as well as Figure 3 and Figure 3-figure supplement 1-4, 2<sup>nd</sup> row)  
165 or an anatomical criterion (Kriegeskorte et al., 2009), such as cortical distance.  
166 This way, noise components should nullify on average in both the Baseline and  
167 Interest condition (Figure 2 and Figure 2-figure supplement 1-5, B., third column),  
168 albeit not necessarily for sparsely populated bins (Figure 2-figure supplement 5,  
169 B., 3<sup>rd</sup> column as well as Figure 3 and Figure 3-figure supplement 1-3, 2<sup>nd</sup> row).  
170 Similarly, given that cross-thresholding reshapes noise components, they might not

A. Empirical repeat data | 25<sup>th</sup> %ile | Dorsal

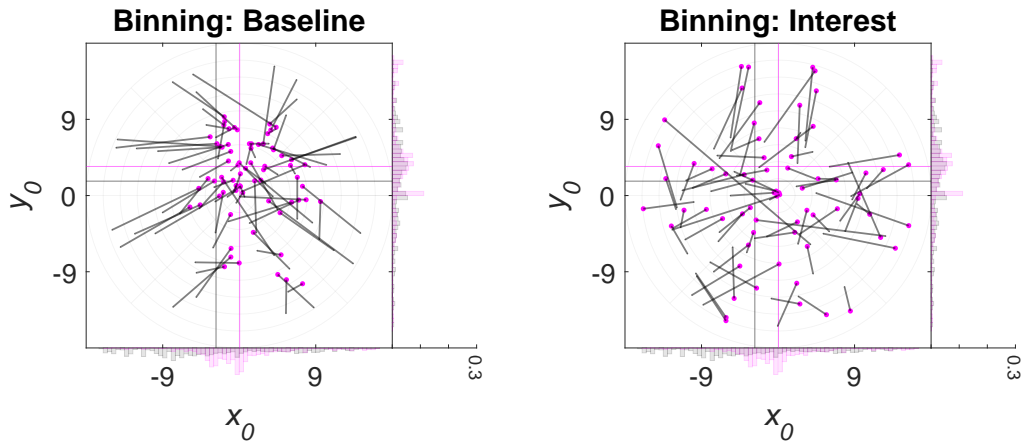

B. Empirical repeat data | 25<sup>th</sup> %ile | Dorsal – Cross-thresholding (Baseline)

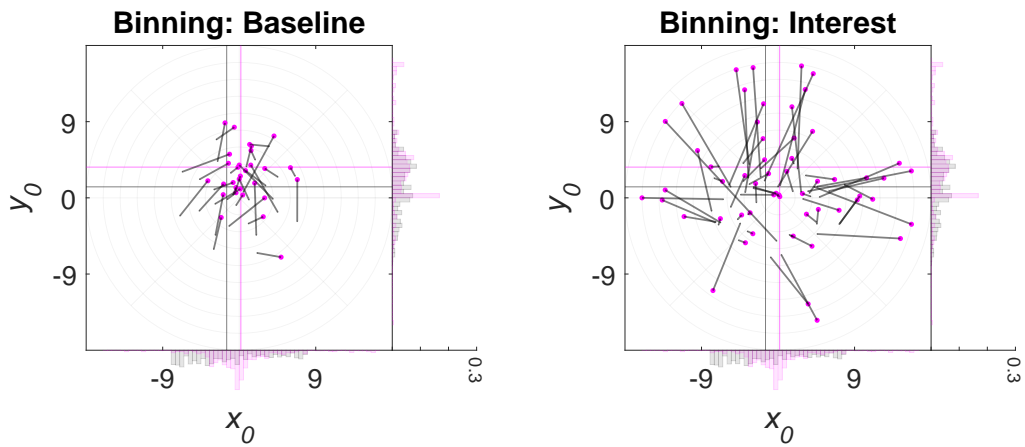

C. Empirical repeat data | 25<sup>th</sup> %ile | Dorsal – Cross-thresholding (Baseline and Interest)

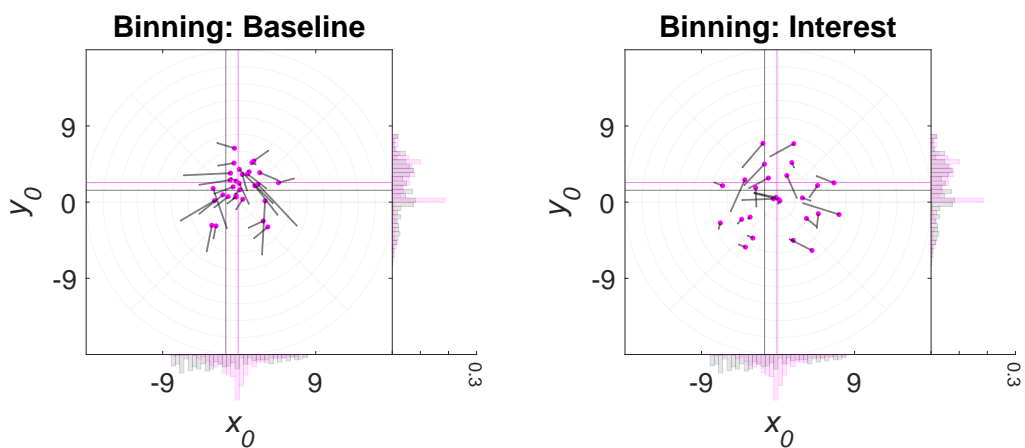

Figure 5. Caption on next page.

**Figure 5. Empirical 2D post hoc binning analysis on  $x_0$  and  $y_0$  | Repeat data | 25<sup>th</sup> %ile participant | Dorsal.** Bin-wise  $x_0$  and  $y_0$  means in the Interest and Baseline condition for repeat data from the HCP belonging to the 25<sup>th</sup> percentile participant of the median  $R^2$  distribution and different data binning scenarios. **A.** Data from the dorsal complex (V3A/B and IPS0–5) without condition cross-thresholding. **B.** Same as A., but with condition cross-thresholding. To this end, eccentricity values falling outside a certain eccentricity range ( $\geq 0$  and  $\leq 8$  dva) and below a certain  $R^2$  cut-off ( $\leq 2.2\%$ ) in the Baseline condition were removed from both conditions. **C.** Same as B., although here, condition cross-thresholding was based on both the Baseline and Interest condition.  $X_0$  and  $y_0$  values in the Baseline and Interest condition were either binned according to eccentricity and polar angle values in the Baseline (1<sup>st</sup> column in A.-C.) or Interest (2<sup>nd</sup> column in A.-C.) condition. The marginal histograms (bin width = 0.5 dva;  $y$ -axis: relative frequency) show the  $x_0$  and  $y_0$  distributions for each condition. Magenta histograms correspond to the Interest condition and gray histograms to the Baseline condition. Note that the range of the marginal  $y$ -axis is the same for all histograms. The large magenta dots (arrow tip) correspond to the means in the Interest condition and the tiny gray dots (arrow knock) to the mean in the Baseline condition. The gray line (arrow shaft) depicts the shift from the Baseline to the Interest condition. The magenta crosshair indicates the location of the overall  $x_0$  and  $y_0$  means for the Interest condition and the gray crosshair the location of the overall means for the Baseline condition. Please note that for subtle differences between the Baseline and Interest condition, the histograms and crosshairs almost coincide (see figure supplements). The light gray radar grid demarks the bin segments. Polar angle bins ranged from 0° to 360° with a constant bin width of 45° and eccentricity bins from 0 to 18 dva with a constant bin width of 2 dva. The maximal eccentricity of the stimulated visual field area subtended 8 dva. HCP = Human connectome project. Dva = Degrees of visual angle.

171 average out with an Independent condition (Figure 2-figure supplement 1-2, B., 3<sup>rd</sup>  
172 column as well as Figure 3-figure supplement 1-2, 2<sup>nd</sup> row). The same can evidently  
173 also happen with an anatomical criterion if the Baseline and Interest condition  
174 are subjected to cross-thresholding. Consequently, unless cross-thresholding can be  
175 omitted or demonstrated to be unbiased, an Independent condition might not be a  
176 safe option. Alternatively, we could use analyses without binning that control for  
177 circularity and regression artifacts or effects could be evaluated against appropriate  
178 null distributions that take into account all statistical dependencies (e.g., Holmes,  
179 2009; Kriegeskorte et al., 2009). A combination of these approaches might be most  
180 fruitful. Regardless of the specific mitigation strategy, we believe that in light of  
181 the many layers of complexity in our analysis pipelines, we need to make it common  
182 practice to perform sanity checks using null simulations and empirical repeat data.

183 Uncontrolled post hoc binning analyses come in many flavours (e.g., centroids,  
184 shift vectors, eccentricity differences,  $x_0$  and  $y_0$  differences, and 1D or 2D bins) and  
185 are not restricted to pRF position estimates. For instance, biases should manifest  
186 equally when binning pRF size in a Baseline and Interest condition according to  
187 pRF positions from either of these conditions. Moreover, partial stimulation of

188 pRFs likely results in heteroskedasticity and positively correlated errors for pRF  
189 size and position. This would, for instance, bias bin-wise pRF size vs eccentricity  
190 or pRF size vs pRF size comparisons where binning is based on non-independent  
191 eccentricity values. Likewise, fitting errors due to partial stimulation should be more  
192 pronounced whenever pRF size is larger, leading to stronger artifactual effects (for  
193 simulations using different levels of noise see [Holmes, 2009](#)). The same is to be  
194 expected based on a higher variability in pRF position estimates for wider pRFs.  
195 These factors might potentially explain why pRF position and size differences have  
196 been reported to be larger in higher-level areas where pRFs are wider. Moreover, the  
197 distribution of errors likely depends on the toolbox that was used for fitting ([Lerma-](#)  
198 [Usabiaga, Benson, Winawer, & Wandell, 2020](#)), making it hard to generalize across  
199 studies. Importantly, uncontrolled single bin (i.e., region of interest) analyses are  
200 equally affected by post-hoc binning ([Kriegeskorte et al., 2009](#)). And of course,  
201 delineations of visual areas in post hoc binning analyses should ideally also be based  
202 upon independent criteria as this is where selection starts.

203 The application of uncontrolled post hoc binning analyses in the pRF literature  
204 might have led to spurious claims about the plasticity of pRFs (see [de Haas et al.,](#)  
205 [2014, 2020](#), for a possible example). Consequently, we urge researcher who engaged  
206 in post hoc binning to check for the severity of biases in their analyses by running  
207 adequate simulations and reanalyzing the original data wherever possible.

208 Without doubt, circularity and/or regression to the mean are thorny and om-  
209 nipresent problems that can manifest subtly and diversely (e.g., [Ball, Squeglia,](#)  
210 [Tapert, & Paulus, 2020](#); [Barnett et al., 2005](#); [Campbell & Kenny, 1999](#); [Eriks-](#)  
211 [son & Häggström, 2014](#); [Gignac & Zajenkowski, 2020](#); [Holmes, 2009](#); [Kilner, 2013](#);  
212 [Kriegeskorte et al., 2009](#); [Preacher et al., 2005](#); [Shanks, 2017](#); [Vul, Harris, Winkiel-](#)  
213 [man, & Pashler, 2009](#)). As such, we need to ensure that the validation of analysis  
214 procedures becomes part and parcel of the scientific process.

## 215 **Materials and Methods**

### 216 **Post hoc binning using simulations**

#### 217 **Stimuli and procedure**

218 For the simulation analyses, we used data from a population receptive field (pRF)  
219 experiment involving a dynamic horizontal bar aperture (length of major axis: 17.15  
220 degrees of visual angle, dva; length of minor axis: 1.27 dva). The bar aperture was  
221 centered and presented within the boundaries of a circular mapping area (diameter:  
222 17.15 dva). It moved consecutively across the mapping area along cardinal (0/180°  
223 and 90/270°) and oblique axes (45/225° and 135/315°) and was superimposed onto a  
224 random dot kinematogram (RDK). The RDK comprised moving black dots (diameter:  
225 0.13 dva) positioned within a square field (size: 17.03 × 17.03 dva). If a dot left  
226 the square field, it was moved back by 1 field width/height. The dots had a density  
227 of 6.89 dots/dva<sup>2</sup>, a lifetime of 36 frames, were repositioned randomly once they had  
228 died, and oscillated according to a sine wave ( $A = 1.29$  dva,  $f = 1$  Hz,  $\omega = 6.28$   
229 rad/s,  $\phi = 0$  rad). The sine wave was rotated with the current orientation of the  
230 bar aperture. The bar aperture and RDK were centered at the screen's midpoint.

231 A semi-transparent ( $\alpha = 50\%$ ) array of 5 vertical ovals was superimposed onto  
232 the bar aperture. One of the ovals was centered at the screen's mid-point (length  
233 of major axis: 0.43 dva; length of minor axis: 0.28 dva) and the remaining ovals  
234 at an eccentricity of 4.29 dva (length of major axis: 0.86 dva; length of minor  
235 axis: 0.57 dva) and different polar angles (45°, 135°, 225°, and 315°). The ovals  
236 were presented as a rapid serial visual presentation (RSVP) task, where each trial  
237 started with 200 ms of oval presentation, followed by a blank (no ovals) of 600 ms.  
238 The ovals' orientation (45° left- or rightwards from vertical) and color (red, yellow,  
239 cyan, orange, brown, white, black, green, and blue) changed pseudorandomly in  
240 each trial with the exception that ovals of the same color were never presented  
241 simultaneously. Participants had to press a button whenever a rightwards oriented  
242 oval was presented in blue or green color. A black radar grid (line width: 0.02 dva)  
243 at low opacity ( $\alpha = 20\%$ ) with 12 radial lines (at polar angles: 0 to 330° with a step

244 size of  $30^\circ$ ) and 18 circles (diameters: 0.95 to 51.42 dva with a step size of 2.97 dva)  
245 was superimposed onto the screen. The radial lines ran from the midpoint of the  
246 screen to the outermost circle.

247 The experiment comprised 4 attention conditions, in which participants were  
248 required to perform the RSVP task on different oval streams whilst ignoring other  
249 streams and the bar aperture. The condition of relevance here is the Center con-  
250 dition, where participants performed the task on the central oval stream. This  
251 condition resembles a standard pRF mapping experiment. Participants performed  
252 2 sessions à 4 runs per condition on consecutive days. The order of conditions was  
253 pseudorandomized.

254 Within each run, the bar aperture moved along each axis twice, so that the  
255 starting point covered all chosen polar angles. Specifically, the sequence of starting  
256 points in each run was:  $90^\circ$ ,  $225^\circ$ ,  $180^\circ$ ,  $315^\circ$ ,  $270^\circ$ ,  $45^\circ$ ,  $0^\circ$ , and  $135^\circ$ . One bar sweep  
257 lasted 28 s (1 step/s). Consecutive bar apertures overlapped by 50%. After 4 bar  
258 sweeps, a blank interval of 28 s (without the bar apertures and RDK) was presented,  
259 during which participants had to refrain from doing the RSVP task (a brief tone  
260 cued the beginning and end of this interval). The position and lifetime of each  
261 dot in the RDK at the start of every 28s-interval was randomized. Experimental  
262 procedures were implemented in Matlab 2014a (8.3; <https://uk.mathworks.com/>)  
263 using Psychtoolbox-3 (3.0.11; [Brainard, 1997](#); [Kleiner et al., 2007](#)) and approved  
264 by the University College London ethics committee. Written informed consent was  
265 obtained from all participants.

## 266 **Apparatus**

267 Functional and anatomical images were acquired at a field strength of 1.5 T on a  
268 Siemens Avanto magnetic resonance imaging (MRI) scanner. All stimuli were pro-  
269 jected onto a screen (resolution:  $1920 \times 1080$  pixels; refresh rate: 60 Hz; background  
270 color: gray) at the back of the MRI scanner. Participants viewed the experiment  
271 through a head-mounted mirror. The viewing distance was approximately 67 cm.  
272 To ensure that participants could view the screen without obstruction, the front  
273 visor of a 32 channel coil was removed, leaving 30 effective channels.



## 274 MRI acquisition

275 We collected anatomical images using a T1-weighted magnetization-prepared rapid  
276 acquisition with gradient echo sequence (repetition time, TR = 2.73 s; echo time,  
277 TE = 3.57 ms; voxel size = 1 mm isotropic; flip angle = 7°; field of view, FoV = 256  
278 mm × 224 mm; matrix size = 256 × 224; 176 sagittal slices) and functional images  
279 using a T2\*-weighted multiband 2D echo-planar imaging sequence (Breuer et al.,  
280 2005, TR = 1 s; TE = 55 ms; voxel size = 2.3 mm isotropic; flip angle = 75°; FoV =  
281 224 mm × 224 mm, no gap, matrix size: 96 × 96, acceleration = 4, 36 transverse  
282 slices). The slice tab for the functional images was aligned to be roughly parallel to  
283 the calcarine sulcus so that the posterior third of the cortex was well covered.

## 284 Preprocessing

285 The initial 10 volumes of each run were discarded to allow for magnetisation to  
286 reach equilibrium. Using SPM8 (6313; [https://www.fil.ion.ucl.ac.uk/spm/  
287 software/spm8/](https://www.fil.ion.ucl.ac.uk/spm/software/spm8/)), functional images were then bias-corrected, realigned, unwarped,  
288 coregistered to the anatomical image, and finally projected onto an anatomical sur-  
289 face model constructed in FreeSurfer (5.3.0; Dale, Fischl, & Sereno, 1999; Fischl,  
290 Sereno, & Dale, 1999). We generated vertex-wise functional MRI (fMRI) time se-  
291 ries per run by determining the functional voxel at half the distance between corre-  
292 sponding vertices in the pial surface and gray-white matter mesh. We then applied  
293 linear detrending to the time series of each run and  $z$ -standardized them. Sur-  
294 face projection, detrending, and  $z$ -standardization were performed in Matlab 2016b  
295 (9.1; <https://uk.mathworks.com/>) using SamSrf7 (7.05; [https://github.com/  
296 samsrf/samsrf/tree/3c7a0e25090e9097d5e2fd95696c00774acd26d6](https://github.com/samsrf/samsrf/tree/3c7a0e25090e9097d5e2fd95696c00774acd26d6)).

## 297 pRF estimation and delineations

298 The vertex-wise preprocessed time series of the Center condition were averaged  
299 across the 2 sessions. We then fit a 2D isotropic Gaussian pRF model with 5  
300 free parameters ( $x_0$ ,  $y_0$ ,  $\sigma$ ,  $\beta_0$ , and  $\beta_1$ ) to the vertex-wise average time series. To  
301 this end, we first predicted pRF responses by calculating the overlap between the

302 pRF model and an indicator function of the bar aperture for each volume using a  
303  $100 \times 100$  pixel matrix. Specifically, we used a 3D search space of possible values  
304 for  $\sigma$  ( $8.5 \times 2^{-5.6:0.2:1}$ ),  $x_0$  and  $y_0$ , and generated pRF responses for each combina-  
305 tion of these values. Values for  $x_0$  and  $y_0$  were first sampled from the polar angle  
306 system (polar angles:  $0:10:350^\circ$ ; eccentricities:  $8.5 \times 2^{-5:0.2:0.6}$ ) and then transformed  
307 to Cartesian coordinates. The pRF response per volume was expressed as mean  
308 percent overlap with the pRF model.

309 To obtain a predicted fMRI time series, we then convolved these pRF responses  
310 with a canonical hemodynamic response function (de Haas et al., 2014). Next, we  
311 calculated the Pearson correlation between the predicted and the observed fMRI  
312 time series and retained the combination of parameter values showing the largest  
313  $R^2$  with all  $R^2$ s  $\geq .01$ . These initial parameter estimates were then used as seeds  
314 for an optimization procedure aimed at further maximizing the Pearson correlation  
315 between the observed and predicted fMRI time series using a Nelder-Mead algo-  
316 rithm (Lagarias, Reeds, Wright, & Wright, 1998; Nelder & Mead, 1965). Lastly,  
317 we estimated  $\beta_0$  and  $\beta_1$  by performing linear regression between the observed and  
318 predicted time series. The final parameter maps were smoothed with a spheri-  
319 cal Gaussian kernel (FWHM = 3mm). Vertices with a very poor  $R^2$  ( $< .01$ ) or  
320 artifacts ( $\sigma \leq 0$ ,  $\beta_1 \leq 0$  or  $\beta_1 > 3$ ) were removed prior to smoothing. V1 hemi-  
321 field maps were manually delineated based on smooth polar angle maps using polar  
322 angle reversals (Engel, Glover, & Wandell, 1997; Sereno et al., 1995; Wandell, Du-  
323 moulin, & Brewer, 2007). These delineations were used as a mask to extract V1 ver-  
324 tices. Fitting, smoothing, and manual delineations were performed in Matlab 2016b  
325 (9.1; <https://uk.mathworks.com/>) using SamSrf7 (7.05; [https://github.com/](https://github.com/samsrf/samsrf/tree/3c7a0e25090e9097d5e2fd95696c00774acd26d6)  
326 [samsrf/samsrf/tree/3c7a0e25090e9097d5e2fd95696c00774acd26d6](https://github.com/samsrf/samsrf/tree/3c7a0e25090e9097d5e2fd95696c00774acd26d6)).

## 327 Simulations

328 As outlined in the main text, we generated 6 simulation cases: a null effect, a  
329 null effect with condition cross-thresholding based on the Baseline condition, a null  
330 effect with condition cross-thresholding based on both the Baseline and Interest  
331 condition, a null effect with eccentricity-scaled noise, a true effect, and a null effect

332 with equidistant binning (instead of decile binning which was applied to the other  
333 cases). These cases were chosen to illustrate a given issue in a clear fashion using  
334 an empirical pRF parameter distribution as a basis, not to mimic the exact prop-  
335 erties of empirical data (which is unfeasible without explicit knowledge of the noise  
336 distribution).

337 For all simulation cases,  $x_0$  and  $y_0$  estimates from both cortical hemispheres were  
338 pooled and empty data points or obvious artifacts removed ( $\sigma \leq 0$  and  $\beta_1 \leq 0$ ).  
339 Moreover, all simulation cases followed the same general procedure of the null effect  
340 involving eccentricity as outlined in the main text (including parameters settings  
341 and the same seed for random number generation) with exceptions as follows.

342 **1D post hoc binning analyses on eccentricity.** For the simulation cases in-  
343 volving condition cross-thresholding, we removed simulated observations falling out-  
344 side a certain eccentricity range ( $\geq 0$  and  $\leq 6$  dva) in the Baseline or Baseline and  
345 Interest condition from all conditions (i.e., Baseline, Interest, and Independent).  
346 For the simulation case involving eccentricity-scaled noise, we used a small standard  
347 deviation ( $sd = 0.25$  dva) of random Gaussian noise to disturb original observations  
348 with smaller eccentricities ( $\geq 0$  and  $< 3$  dva) and a larger standard deviation ( $sd =$   
349  $2$  dva) to disturb original observations with larger eccentricities ( $\geq 3$  dva). For the  
350 simulation case involving a true effect, we induced a radial increase in eccentricity  
351 of 2 dva in the Interest condition. For the simulation case involving equidistant bin-  
352 ning, we used a constant bin width of 1.75 dva and an overall binning range of 0 to  
353 19.25 dva eccentricity. For all simulation cases, the Independent condition consisted  
354 of a second draw (resample) of the Baseline condition.

355 **2D post hoc binning analyses on  $x_0$  and  $y_0$ .** Apart from a 1D binning analysis  
356 on eccentricity, we also conducted a 2D binning analysis on the simulated  $x_0$  and  
357  $y_0$  values. To this end, we converted the  $x_0$  and  $y_0$  values to polar coordinates, that  
358 is, polar angle and eccentricity (Figure 1). We then binned the  $x_0$  and  $y_0$  values  
359 in the Baseline or Interest condition according to their polar coordinates in the  
360 Baseline, Interest, or Independent condition using equidistant bins and calculated  
361 the bin-wise  $x_0$  and  $y_0$  means for each condition. The condition-wise means were

362 visualized as vector graphs. The polar angle bins ranged from  $0^\circ$  to  $360^\circ$  with a  
363 constant bin width of  $45^\circ$ . The eccentricity bins ranged from 0 to 22 dva (for the  
364 simulation case involving a true effect) or from 0 to 20 dva (for all other simulation  
365 cases) with a constant bin width of 2 dva. The 2D binning analysis was performed  
366 for all aforementioned simulation cases (apart from the case of equidistant binning  
367 of course).

## 368 Post hoc binning using repeat data

369 For the repeat data analysis, we used publicly available pRF estimates from the  
370 Human Connectome Project 7 T Retinotopy Dataset (Benson et al., 2018, 2020).  
371 These estimates stem from a split-half analysis where a 2D isotropic Gaussian with  
372 a subadditive exponent was fit to fMRI time series from the first and second half of  
373 6 pRF mapping runs. For each half, 6 estimates were obtained for each grayordinate  
374 (vertex), that is, pRF polar angle, pRF eccentricity, pRF size, pRF gain, percentage  
375 of  $R^2$ , and mean signal intensity. The maximal eccentricity of the mapping area  
376 subtended 8 dva. For further details, see Benson et al. (2018).

377 Following Benson et al. (2018), we analysed complexes of visual areas across  
378 hemispheres for the 25<sup>th</sup> and 75<sup>th</sup> percentile participants of the  $R^2$  distribution using  
379 delineations from Wang et al.'s (2015) atlas. Benson et al. (2018) generated the  $R^2$   
380 distribution by calculating the median  $R^2$  for each participant across grayordinates  
381 from both cortical hemispheres within all areas of Wang et al.'s (2015) atlas. The  
382 posterior complex consisted of V1-V3, the ventral complex of VO-1/2 and PHC-1/2,  
383 the dorsal complex of V3A/B and IPS0-5, and the lateral complex of LO-1/2 and  
384 TO-1/2. For our purposes, we focused on the posterior and dorsal complexes, as  
385 those came with a larger number of available data points (which was particularly  
386 necessary to perform the 2D post hoc binning analysis and generate vector graphs).

387 To obtain  $x_0$  and  $y_0$  estimates, polar angle and eccentricity estimates were con-  
388 verted to Cartesian coordinates. The eccentricity,  $x_0$ , and  $y_0$  estimates of the first  
389 half were used as a Baseline condition and those of the second half as an Interest  
390 condition. Grayordinates with unusual/implausible values ( $R^2 \leq 0\%$  or  $\sigma \leq 0$ ) in  
391 either condition were removed from both conditions.

392 Similar to the simulation-based analyses, binning was either based on the Interest  
393 or Baseline condition and bin-wise means were calculated. Moreover, binning was  
394 either performed with or without condition cross-thresholding. As for the latter  
395 case, we removed observations falling outside a certain eccentricity range ( $\geq 0$  and  
396  $\leq 8$  dva) or below a certain  $R^2$  cut-off ( $\leq 2.2\%$ ) in the Baseline or Baseline and  
397 Interest condition from both conditions. The  $R^2$  cut-off of 2.2% was adopted from  
398 [Benson et al. \(2018\)](#).

399 The 1D binning analysis involving eccentricity and the 2D binning analysis in-  
400 volving  $x_0$  and  $y_0$  were conducted as for the simulated data, although, here, the  
401 eccentricity bins for the 2D analysis ranged from 0 to 18 dva with a constant bin  
402 width of 2 dva. All binning analyses (including those on simulated data) were im-  
403 plemented in Matlab 2016b (9.1; <https://uk.mathworks.com/>) using custom code.

## 404 Data and code availability

405 Preprocessed data, custom code, and figures are available at [https://doi.org/](https://doi.org/10.17605/OSF.IO/WJADP)  
406 [10.17605/OSF.IO/WJADP](https://doi.org/10.17605/OSF.IO/WJADP).

## 407 Acknowledgements

408 This research was supported by European Research Council Starting Grants to DSS  
409 (WMOSPOTWU, 310829) and BdH (INDIVISUAL, 852885). BdH was further  
410 supported by the Deutsche Forschungsgemeinschaft (222641018-SFB/TRR 135 TP  
411 A8).

## 412 Declaration of competing interest

413 The authors declare no conflict of interest.

## 414 References

- 415 Alvarez, I., de Haas, B., Clark, C. A., Rees, G., & Samuel Schwarzkopf, D.  
416 (2015). Comparing different stimulus configurations for population recep-  
417 tive field mapping in human fMRI. *Front. Hum. Neurosci.*, *9*, 96. doi:  
418 10.3389/fnhum.2015.00096
- 419 Ball, T. M., Squeglia, L. M., Tapert, S. F., & Paulus, M. P. (2020). Double dipping  
420 in machine learning: Problems and solutions. *Biol. Psychiatry Cogn. Neurosci.*  
421 *Neuroimaging*, *5*(3), 261–263. doi: 10.1016/j.bpsc.2019.09.003
- 422 Barnett, A. G., van der Pols, J. C., & Dobson, A. J. (2005). Regression to the  
423 mean: What it is and how to deal with it. *Int. J. Epidemiol.*, *34*(1), 215–220.  
424 doi: 10.1093/ije/dyh299
- 425 Barton, B., & Brewer, A. A. (2015). fMRI of the rod scotoma elucidates cortical rod  
426 pathways and implications for lesion measurements. *Proc. Natl. Acad. Sci. U.*  
427 *S. A.*, *112*(16), 5201–5206. doi: 10.1073/pnas.1423673112
- 428 Benson, N. C., Jamison, K. W., Arcaro, M. J., Vu, A. T., Glasser, M. F., Coalson,  
429 T. S., . . . Kay, K. (2018). The Human Connectome Project 7 Tesla retinotopy  
430 dataset: Description and population receptive field analysis. *J. Vis.*, *18*(13),  
431 1–22. doi: 10.1167/18.13.23
- 432 Benson, N. C., Jamison, K. W., Arcaro, M. J., Vu, A. T., Glasser, M. F., Coalson,  
433 T. S., . . . Kay, K. (2020). *The HCP 7T Retinotopy Dataset*. Retrieved from  
434 [osf.io/bw9ec](https://osf.io/bw9ec)
- 435 Binda, P., Thomas, J. M., Boynton, G. M., & Fine, I. (2013). Minimizing biases  
436 in estimating the reorganization of human visual areas with bold retinotopic  
437 mapping. *J. Vis.*, *13*(7), 1–16. doi: 10.1167/13.7.14
- 438 Brainard, D. H. (1997). The Psychophysics Toolbox. *Spat. Vis.*, *10*(4), 433–436.  
439 doi: 10.1163/156856897X00357
- 440 Breuer, F. A., Blaimer, M., Heidemann, R. M., Mueller, M. F., Griswold, M. A.,  
441 & Jakob, P. M. (2005). Controlled aliasing in parallel imaging results in  
442 higher acceleration (CAIPIRINHA) for multi-slice imaging. *Magn. Reson.*  
443 *Med.*, *53*(3), 684–691. doi: 10.1002/mrm.20401

- 444 Campbell, D. T., & Kenny, D. A. (1999). *A primer on regression artifacts*. New  
445 York, NY: Guilford Press.
- 446 Carvalho, J., Invernizzi, A., Ahmadi, K., Hoffmann, M. B., Renken, R. J., &  
447 Cornelissen, F. W. (2020). Micro-probing enables fine-grained mapping of  
448 neuronal populations using fMRI. *Neuroimage*, *209*, 116423. doi: 10.1016/  
449 j.neuroimage.2019.116423
- 450 Cohen, J., Cohen, P., West, S. G., & Aiken, L. S. (2003). *Applied multiple regres-*  
451 *sion/correlation analysis for the behavioral sciences*. Mahwah, NJ: Lawrence  
452 Erlbaum Associates.
- 453 Dale, A. M., Fischl, B., & Sereno, M. I. (1999). Cortical surface-based analysis:  
454 I. Segmentation and surface reconstruction. *Neuroimage*, *9*(2), 179–194. doi:  
455 10.1006/ning.1998.0395
- 456 de Haas, B., Schwarzkopf, D. S., Anderson, E. J., & Rees, G. (2014). Perceptual load  
457 affects spatial tuning of neuronal populations in human early visual cortex.  
458 *Curr. Biol.*, *24*(2), R66–R67. doi: 10.1016/j.cub.2013.11.061
- 459 de Haas, B., Schwarzkopf, D. S., Anderson, E. J., & Rees, G. (2020). Retraction  
460 Notice to: Perceptual load affects spatial tuning of neuronal populations in  
461 human early visual cortex. *Curr. Biol.*, *30*(23), 4814. doi: 10.1016/j.cub.2020  
462 .11.015
- 463 Dumoulin, S. O., & Knapen, T. (2018). How visual cortical organization is altered by  
464 ophthalmologic and neurologic disorders. *Annu. Rev. Vis. Sci.*, *4*(1), 357–379.  
465 doi: 10.1146/annurev-vision-091517-033948
- 466 Dumoulin, S. O., & Wandell, B. A. (2008). Population receptive field estimates in  
467 human visual cortex. *Neuroimage*, *39*(2), 647–660. doi: 10.1016/j.neuroimage  
468 .2007.09.034
- 469 Engel, S. A., Glover, G. H., & Wandell, B. A. (1997). Retinotopic organization  
470 in human visual cortex and the spatial precision of functional MRI. *Cereb.*  
471 *Cortex*, *7*(2), 181–192. doi: 10.1093/cercor/7.2.181
- 472 Eriksson, K., & Häggström, O. (2014). Lord’s paradox in a continuous setting and  
473 a regression artifact in numerical cognition research. *PLoS One*, *9*(4), e95949.  
474 doi: 10.1371/journal.pone.0095949

- 475 Fischl, B., Sereno, M. I., & Dale, A. M. (1999). Cortical surface-based analysis:  
476 II. Inflation, flattening, and a surface-based coordinate system. *Neuroimage*,  
477 *9*(2), 195–207. doi: 10.1006/nimg.1998.0396
- 478 Galton, F. (1886). Regression towards mediocrity in hereditary stature. *J. Anthro-*  
479 *pol. Inst. Gt. Britain Irel.*, *1*, 246–263. doi: 10.1017/CBO9781107415324.004
- 480 Gignac, G. E., & Zajenkowski, M. (2020). The Dunning-Kruger effect is (mostly) a  
481 statistical artefact: Valid approaches to testing the hypothesis with individual  
482 differences data. *Intelligence*, *80*. doi: 10.1016/j.intell.2020.101449
- 483 Haak, K. V., Cornelissen, F. W., & Morland, A. B. (2012). Population receptive  
484 field dynamics in human visual cortex. *PLoS One*, *7*(5), e37686. doi: 10.1371/  
485 journal.pone.0037686
- 486 Holmes, N. P. (2009). The principle of inverse effectiveness in multisensory integra-  
487 tion: Some statistical considerations. *Brain Topogr.*, *21*(3-4), 168–176. doi:  
488 10.1007/s10548-009-0097-2
- 489 Infanti, E., & Schwarzkopf, D. S. (2020). Mapping sequences can bias population  
490 receptive field estimates. *Neuroimage*, *211*, 116636. doi: 10.1016/j.neuroimage  
491 .2020.116636
- 492 Kenny, D. A. (2005). Regression artifacts. In B. S. Everitt & D. C. Howell (Ed.),  
493 *Encycl. stat. behav. sci.* (pp. 1723–1725). Chichester, UK.
- 494 Kilner, J. M. (2013). Bias in a common EEG and MEG statistical analysis and  
495 how to avoid it. *Clin. Neurophysiol.*, *124*(10), 2062–2063. doi: 10.1016/  
496 j.clinph.2013.03.024
- 497 Klein, B. P., Harvey, B. M., & Dumoulin, S. O. (2014). Attraction of position pref-  
498 erence by spatial attention throughout human visual cortex. *Neuron*, *84*(1),  
499 227–237. doi: 10.1016/j.neuron.2014.08.047
- 500 Kleiner, M., Brainard, D. H., Pelli, D. G., Broussard, C., Wolf, T., & Niehorster,  
501 D. (2007). What’s new in Psychtoolbox-3? [ECVP abstract supple-  
502 ment]. *Perception*, *36*. doi: [http://journals.sagepub.com/doi/10.1177/  
503 03010066070360S101](http://journals.sagepub.com/doi/10.1177/03010066070360S101)
- 504 Kriegeskorte, N., Simmons, W. K., Bellgowan, P. S., & Baker, C. I. (2009). Cir-  
505 cular analysis in systems neuroscience: The dangers of double dipping. *Nat.*



- 506 *Neurosci.*, 12(5), 535–540. doi: 10.1038/nn.2303
- 507 Lagarias, J. C., Reeds, J. A., Wright, M. H., & Wright, P. E. (1998). Convergence  
508 properties of the Nelder-Mead simplex method in low dimensions. *SIAM J.*  
509 *Optim.*, 9(1), 112–147. doi: 10.1137/S1052623496303470
- 510 Le, R., Witthoft, N., Ben-Shachar, M., & Wandell, B. (2017). The field of view  
511 available to the ventral occipito-temporal reading circuitry. *J. Vis.*, 17(4),  
512 1–19. doi: 10.1167/17.4.6
- 513 Lerma-Usabiaga, G., Benson, N., Winawer, J., & Wandell, B. A. (2020). A validation  
514 framework for neuroimaging software: The case of population receptive fields.  
515 *PLOS Comput. Biol.*, 16(6), e1007924. doi: 10.1371/journal.pcbi.1007924
- 516 Makin, T. R., & De Xivry, J. J. O. (2019). Ten common statistical mistakes  
517 to watch out for when writing or reviewing a manuscript. *Elife*, 8. doi:  
518 10.7554/eLife.48175
- 519 Nelder, J. A., & Mead, R. (1965). A simplex method for function minimization.  
520 *Comput. J.*, 7(4), 308–313. doi: 10.1093/comjnl/7.4.308
- 521 Prabhakaran, G. T., Carvalho, J., Invernizzi, A., Kanowski, M., Renken, R. J.,  
522 Cornelissen, F. W., & Hoffmann, M. B. (2020). Foveal pRF properties in the  
523 visual cortex depend on the extent of stimulated visual field. *Neuroimage*,  
524 222, 117250. doi: 10.1016/j.neuroimage.2020.117250
- 525 Preacher, K. J., MacCallum, R. C., Rucker, D. D., & Nicewander, W. A. (2005). Use  
526 of the extreme groups approach: A critical reexamination and new recommen-  
527 dations. *Psychol. Methods*, 10(2), 178–192. doi: 10.1037/1082-989X.10.2.178
- 528 Schwarz, W., & Reike, D. (2018). Regression away from the mean: Theory and  
529 examples. *Br. J. Math. Stat. Psychol.*, 71(1), 186–203. doi: 10.1111/bmsp  
530 .12106
- 531 Sereno, M. I., Dale, A. M., Reppas, J. B., Kwong, K. K., Belliveau, J. W., Brady,  
532 T. J., . . . Tootell, R. B. (1995). Borders of multiple visual areas in humans re-  
533 vealed by functional magnetic resonance imaging. *Science (80-. )*, 268(5212),  
534 889–893. doi: 10.1126/science.7754376
- 535 Shanks, D. R. (2017). Regressive research: The pitfalls of post hoc data selection  
536 in the study of unconscious mental processes. *Psychon. Bull. Rev.*, 24(3),

- 537 752–775. doi: 10.3758/s13423-016-1170-y
- 538 van Dijk, J. A., de Haas, B., Moutsiana, C., & Schwarzkopf, D. S. (2016). Inter-  
539 session reliability of population receptive field estimates. *Neuroimage*, *143*,  
540 293–303. doi: 10.1016/j.neuroimage.2016.09.013
- 541 van Es, D. M., Theeuwes, J., & Knapen, T. (2018). Spatial sampling in human  
542 visual cortex is modulated by both spatial and feature-based attention. *Elife*,  
543 *7*. doi: 10.7554/eLife.36928
- 544 Vo, V. A., Sprague, T. C., & Serences, J. T. (2017). Spatial tuning shifts increase the  
545 discriminability and fidelity of population codes in visual cortex. *J. Neurosci.*,  
546 *37*(12), 3386–3401. doi: 10.1523/JNEUROSCI.3484-16.2017
- 547 Vul, E., Harris, C., Winkielman, P., & Pashler, H. (2009). Puzzlingly high correla-  
548 tions in fMRI studies of emotion, personality, and social cognition. *Perspect.*  
549 *Psychol. Sci.*, *4*(3), 319–324. doi: 10.1111/j.1745-6924.2009.01132.x
- 550 Wandell, B. A., Dumoulin, S. O., & Brewer, A. A. (2007). Visual field maps in  
551 human cortex. *Neuron*, *56*(2), 366–383. doi: 10.1016/j.neuron.2007.10.012
- 552 Wang, L., Mruczek, R. E., Arcaro, M. J., & Kastner, S. (2015). Probabilistic maps  
553 of visual topography in human cortex. *Cereb. Cortex*, *25*(10), 3911–3931. doi:  
554 10.1093/cercor/bhu277
- 555 Yildirim, F., Carvalho, J., & Cornelissen, F. W. (2018). A second-order orientation-  
556 contrast stimulus for population-receptive-field-based retinotopic mapping.  
557 *Neuroimage*, *164*, 183–193. doi: 10.1016/j.neuroimage.2017.06.073

558 **Supplementary figures**

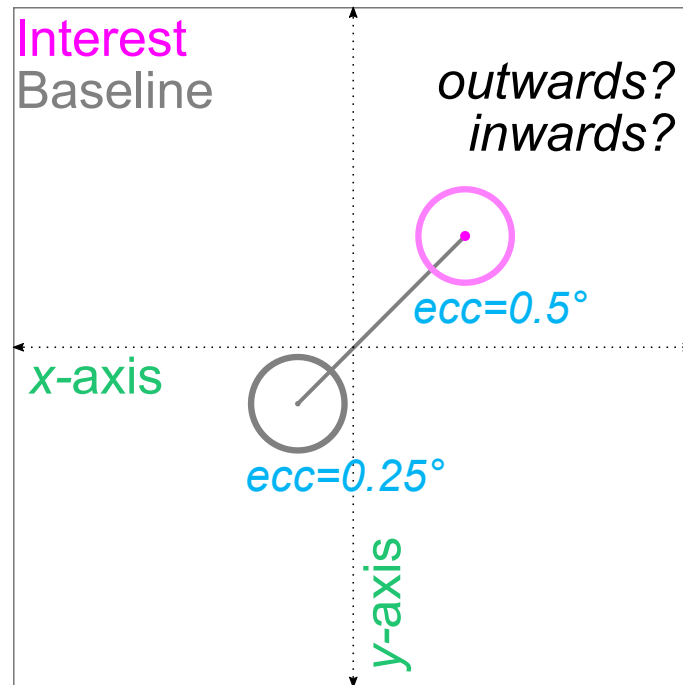

*Figure 1-figure supplement 1. Interpretation of changes in eccentricity.* The same as [Figure 1](#), although here, the pRFs shifts from one visual field quadrant to another in the Interest compared to the Baseline condition. This can happen due to noise or when visual field maps partially cover the ipsilateral hemifield. In such cases, an increase or decrease in eccentricity does not necessarily correspond to an outwards or inwards shift in the traditional sense. For instance, imagine that a pRF sits at  $x_0 = -0.18$  dva and  $y_0 = -0.18$  dva in the Baseline condition ( $\text{ecc} = 0.25$  dva) but at  $x_0 = 0.36$  dva and  $y_0 = 0.36$  dva in the Interest condition ( $\text{ecc} = 0.5$  dva). This would result in an increase in eccentricity, which might be interpreted as an outwards shift, although the pRF shifts effectively radially inwards until it reaches the origin and then outwards. We can likewise imagine that the pRF shifts horizontally to  $x_0 = 0.36$  dva and  $y_0 = -0.36$  dva in the Interest condition. Importantly, removing such shifts would again bias noise components in non-predictable ways (see condition cross-thresholding in the main text and [Figure 2-figure supplement 1-2](#)) and therefore does not seem a valid option. Dva = Degrees of visual angle.

### A. Simulated null effect - Cross-thresholding (Baseline)

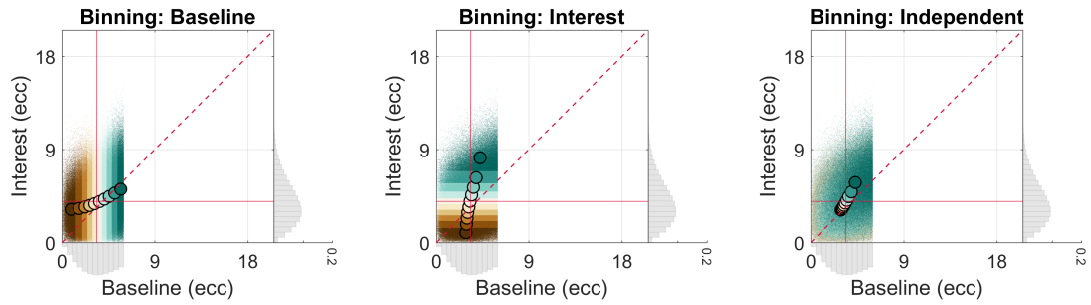

### B. Errors

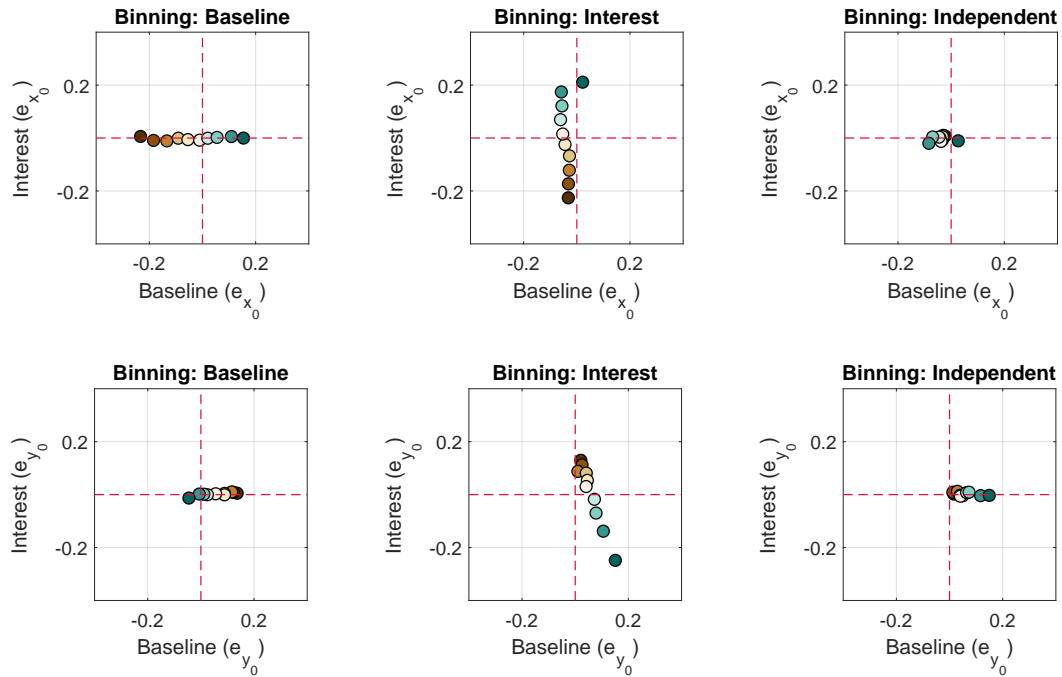

*Figure 2-figure supplement 1. Simulated 1D post hoc binning analysis on eccentricity | Null effect — Cross-thresholding (Baseline).* The same as in [Figure 2](#), although here, simulated observations falling outside a certain eccentricity range ( $\geq 0$  and  $\leq 6$  dva) in the Baseline condition were removed from all conditions — a simulation case we term *cross-thresholding (Baseline)*.

### A. Simulated null effect - Cross-thresholding (Baseline and Interest)

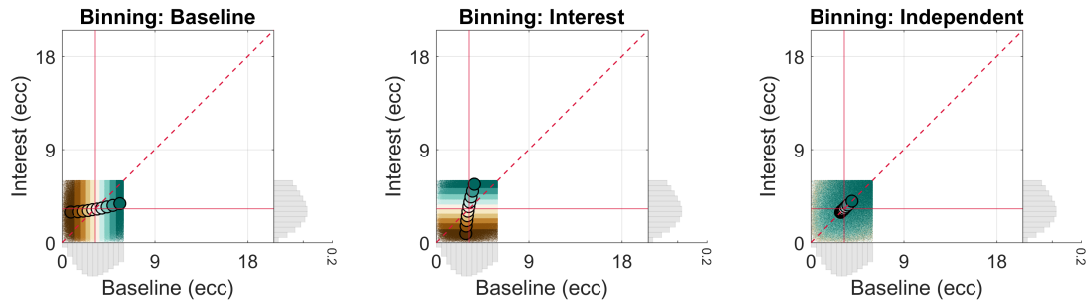

### B. Errors

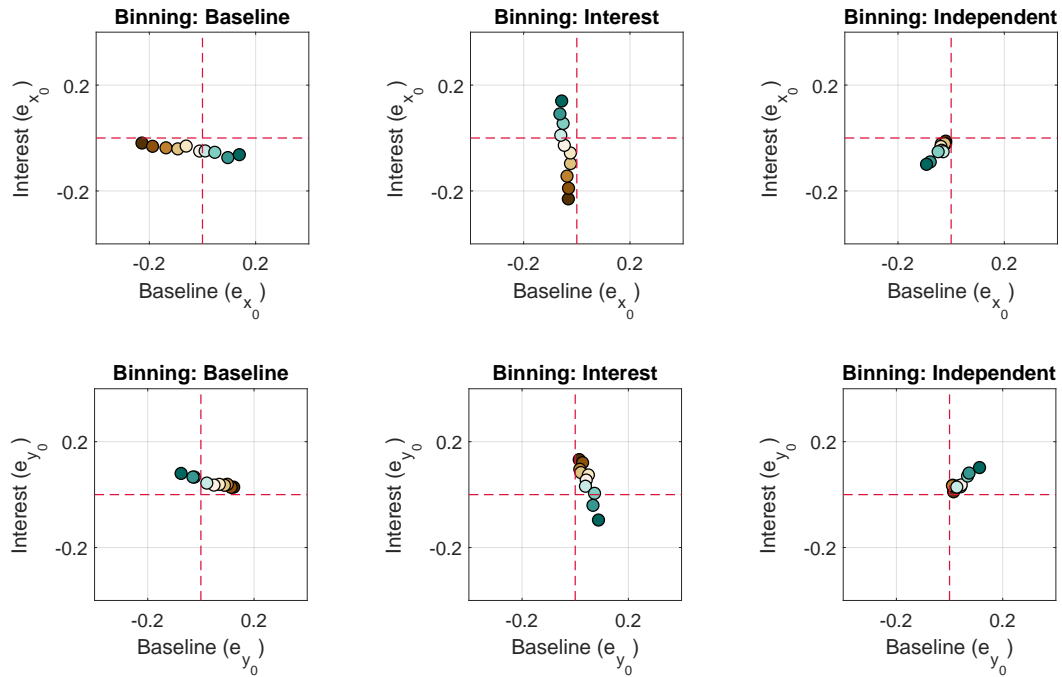

*Figure 2-figure supplement 2. Simulated 1D post hoc binning analysis on eccentricity | Null effect — Cross-thresholding (Baseline and Interest).* The same as in [Figure 2-figure supplement 1](#), although here, condition cross-thresholding was based on both the Baseline and Interest condition — a simulation case we term *cross-thresholding (Baseline and Interest)*.

### A. Simulated null effect - Eccentricity-scaled noise

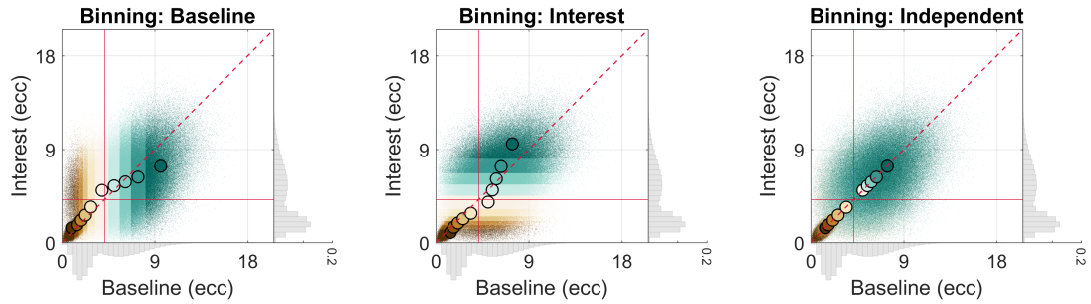

### B. Errors

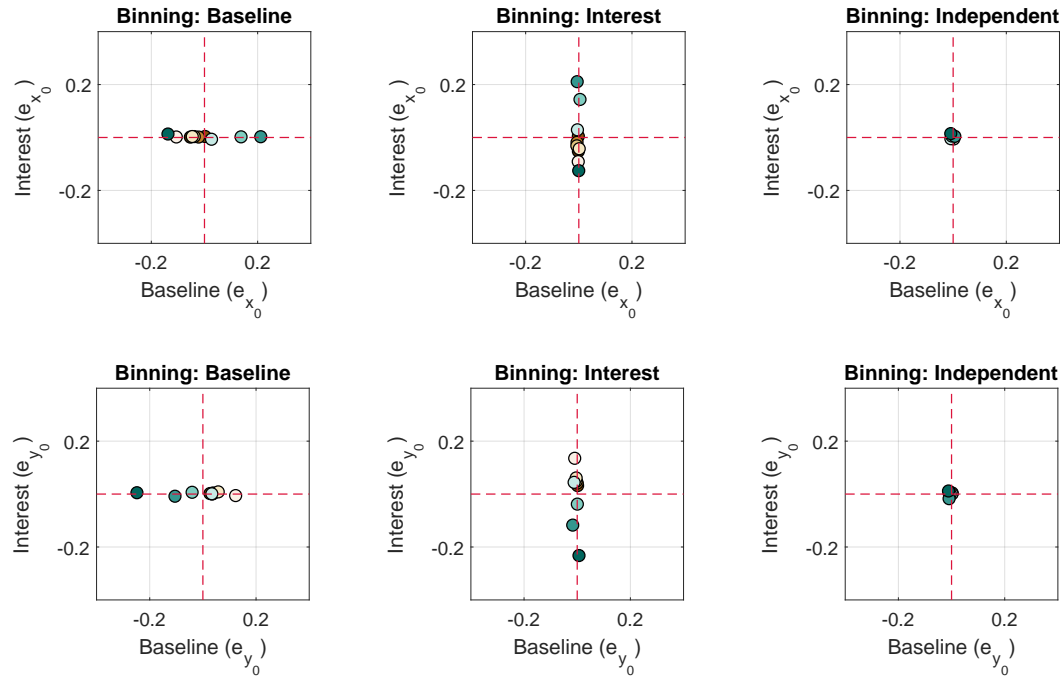

Figure 2-figure supplement 3. **Simulated 1D post hoc binning analysis on eccentricity | Null effect — Eccentricity-scaled noise.** The same as in Figure 2, although here, original observations having smaller eccentricities ( $\geq 0$  and  $< 3$  dva) were disturbed by random Gaussian noise with a smaller standard deviation ( $sd = 0.25$  dva) and those having larger eccentricities ( $\geq 3$  dva) by random Gaussian noise with a larger standard deviation ( $sd = 2$  dva) — a simulation case we term *eccentricity-scaled noise*.

### A. Simulated true effect - Radial shift

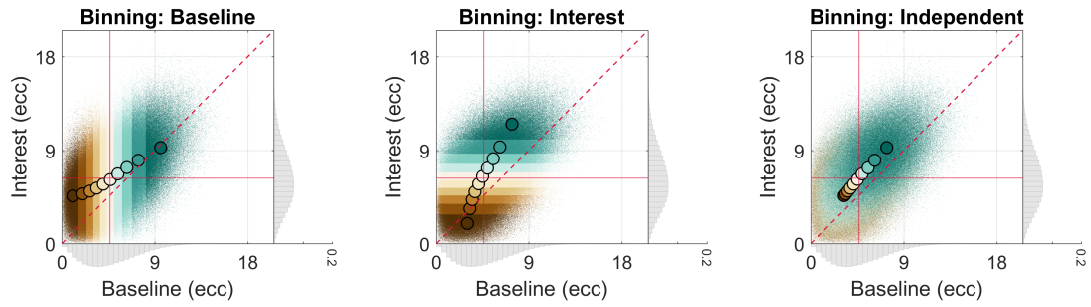

### B. Errors

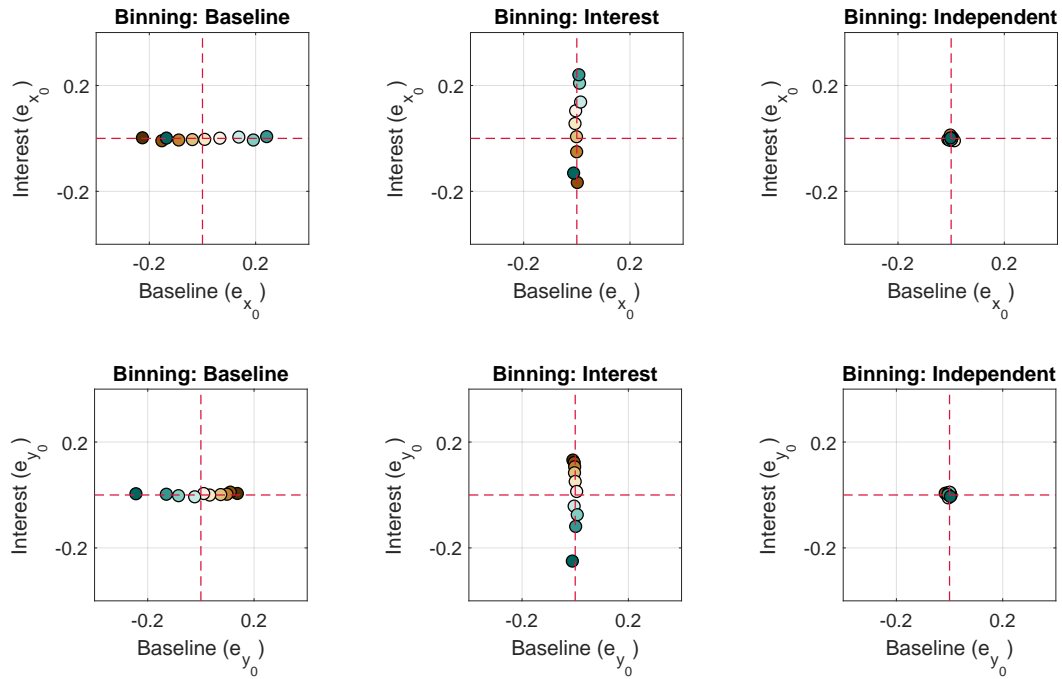

Figure 2-figure supplement 4. **Simulated 1D post hoc binning analysis on eccentricity | True effect — Radial shift.** The same as in Figure 2, although here, we simulated a true effect, that is, a radial increase in eccentricity of 2 dva in the Interest as compared to the Baseline condition.

### A. Simulated null effect - Equidistant binning

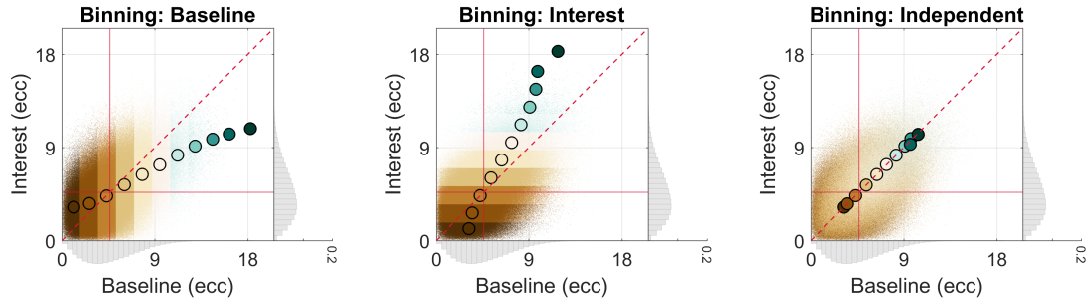

### B. Errors

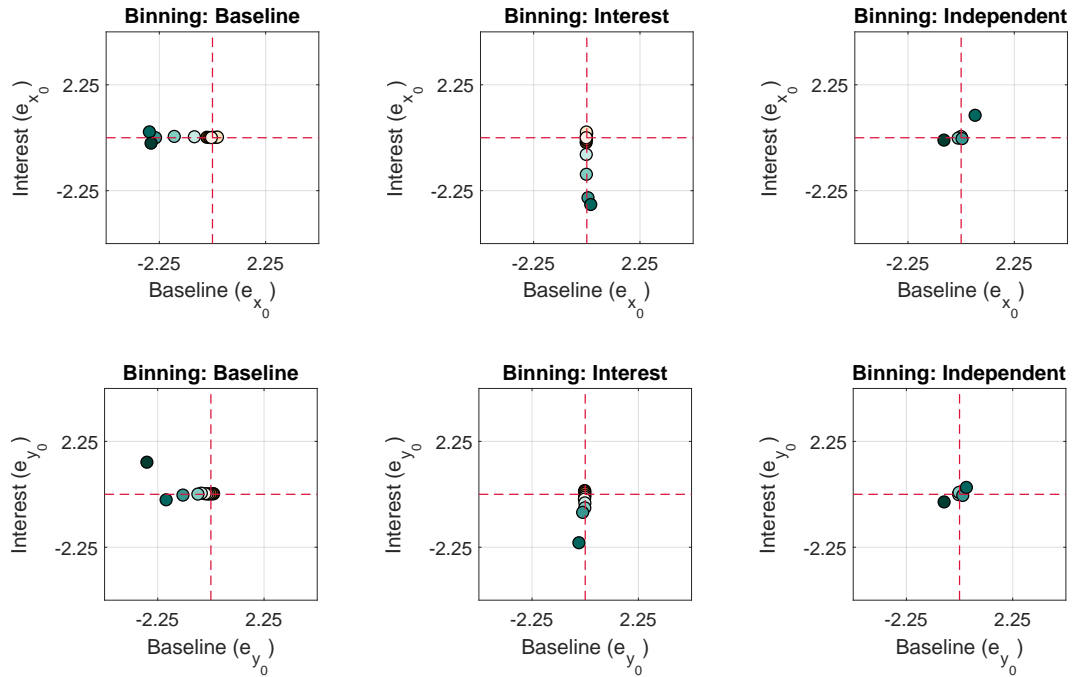

**Figure 2-figure supplement 5. Simulated 1D post hoc binning analysis on eccentricity | Null effect — Equidistant binning.** The same as in Figure 2, although here, equidistant binning was used. The equidistant bins ranged from an eccentricity of 0 dva to an eccentricity of 19.25 dva with a constant bin-width of 1.75 dva. Please note the different  $x$ - and  $y$ -axis ranges in B. relative to Figure 2 and other figure supplements (-4.5 to -4.5 vs -0.4 to 0.4, respectively) as well as the different number of bins (11 vs 10, respectively).



Simulated null effect - Cross-thresholding (Baseline)

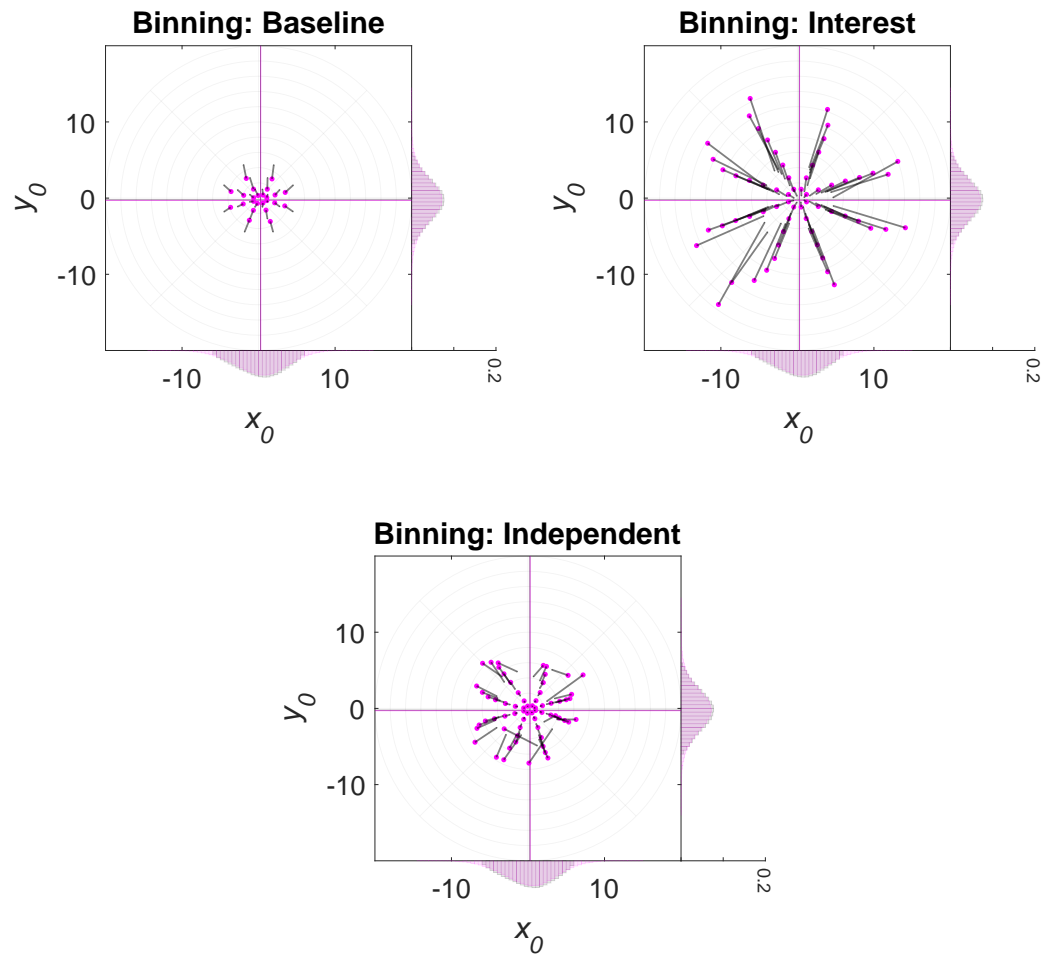

Figure 3-figure supplement 1. **Simulated 2D post hoc binning analysis on  $x_0$  and  $y_0$  | Null effect — Cross-thresholding (Baseline)**. The same as in Figure 3, although here, simulated observations falling outside a certain eccentricity range ( $\geq 0$  and  $\leq 6$  dva) in the Baseline condition were removed from all conditions — a simulation case we term *cross-thresholding (Baseline)*.

Simulated null effect - Cross-thresholding (Baseline and Interest)

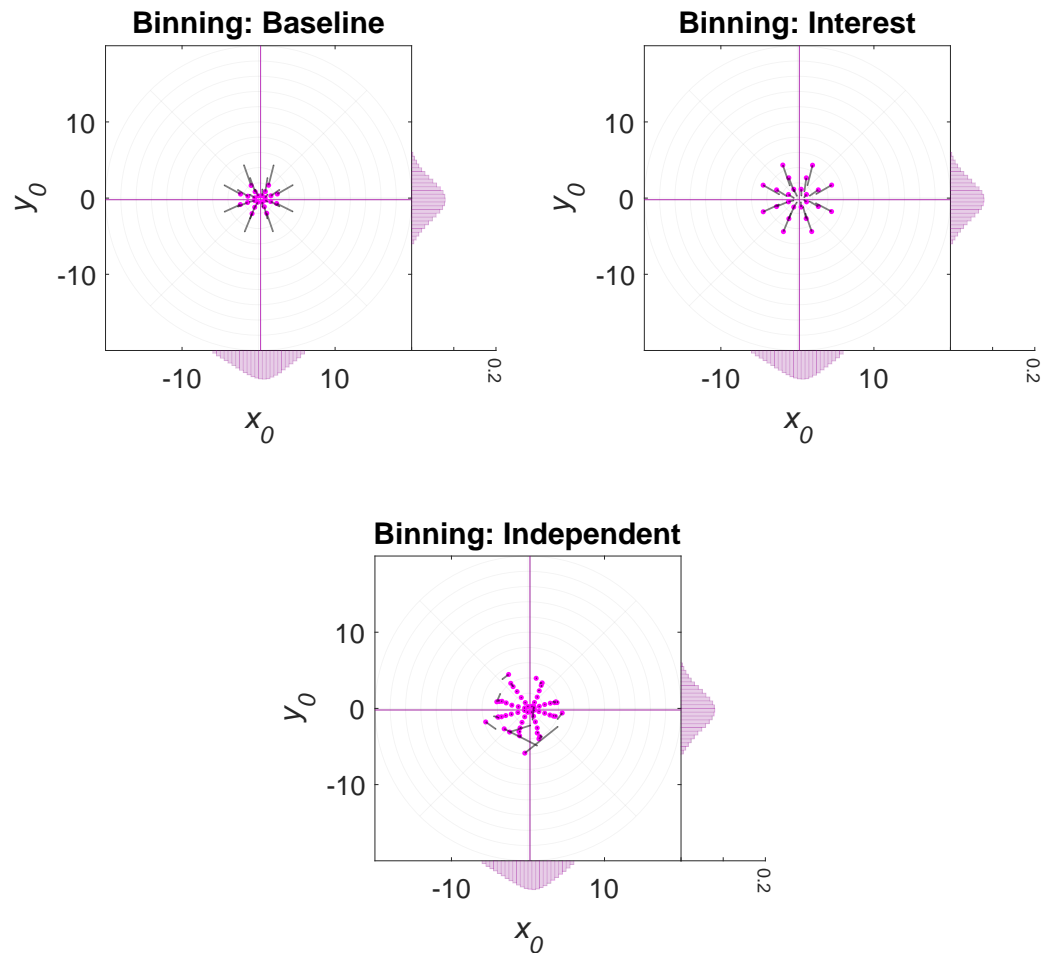

Figure 3-figure supplement 2. **Simulated 2D post hoc binning analysis on  $x_0$  and  $y_0$  | Null effect — Cross-thresholding (Baseline and Interest).** The same as in Figure 3-figure supplement 1, although here, condition cross-thresholding was based on both the Baseline and Interest condition — a simulation case we term *cross-thresholding (Baseline and Interest)*.

Simulated null effect - Eccentricity-scaled noise

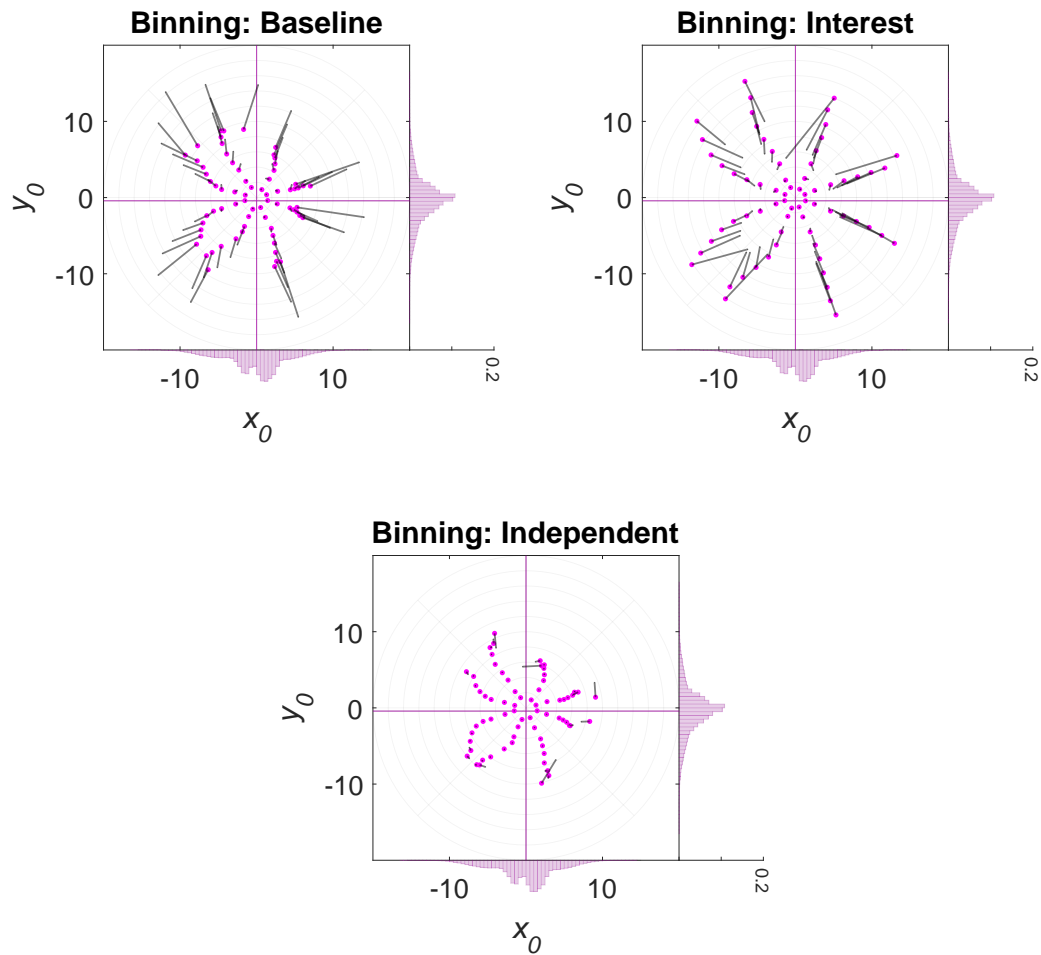

*Figure 3-figure supplement 3. Simulated 2D post hoc binning analysis on  $x_0$  and  $y_0$  | Null effect — Eccentricity-scaled noise.* The same as in [Figure 3](#), although here, original observations having smaller eccentricities ( $\geq 0$  and  $< 3$  dva) were disturbed by random Gaussian noise with a smaller standard deviation ( $sd = 0.25$  dva) and those having larger eccentricities ( $\geq 3$  dva) by random Gaussian noise with a larger standard deviation ( $sd = 2$  dva) — a simulation case we term *eccentricity-scaled noise*.

Simulated true effect - Radial shift

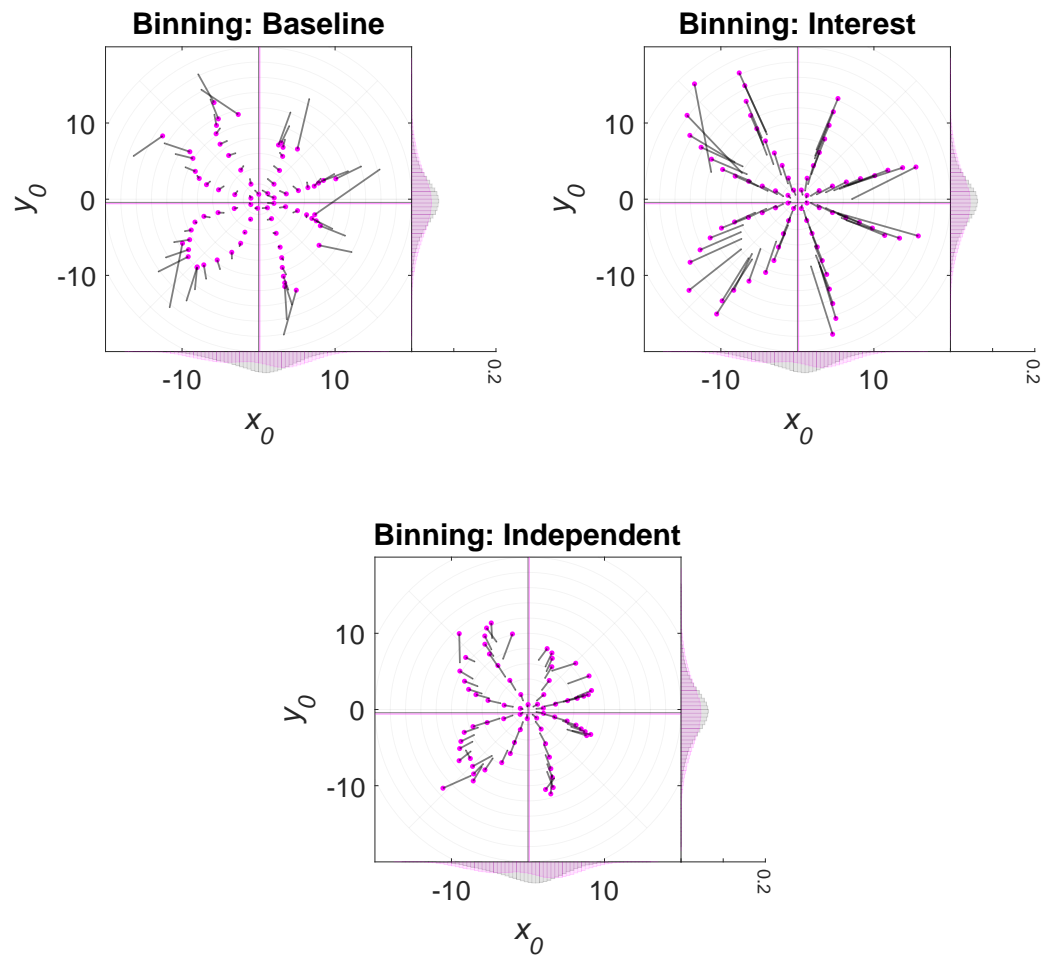

Figure 3-figure supplement 4. **Simulated 2D post hoc binning analysis on  $x_0$  and  $y_0$  | True effect — Radial shift.** The same as in Figure 3, although here, we simulated a true effect, that is, a radial increase in eccentricity of 2 dva in the Interest as compared to the Baseline condition. Note that the eccentricity bins ranged from 0 to 22 dva (instead of 0 to 20 dva) here.

A. Empirical repeat data | 25<sup>th</sup> %ile | Posterior

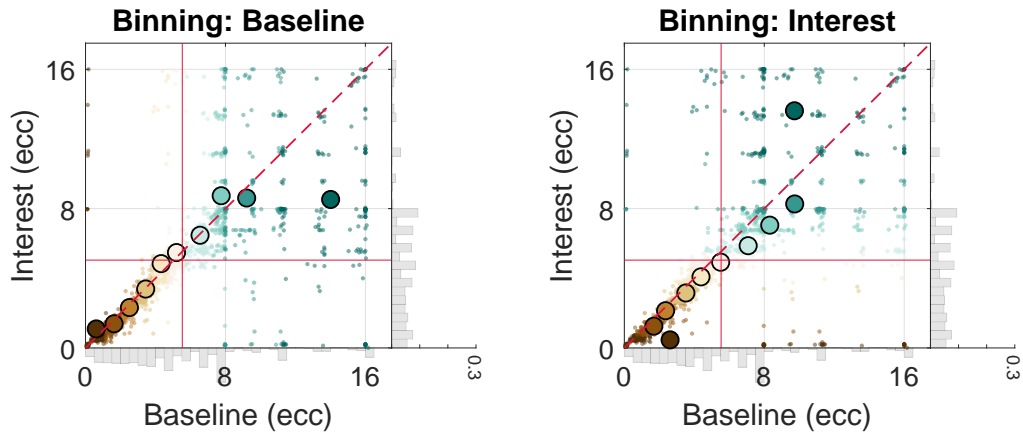

B. Empirical repeat data | 25<sup>th</sup> %ile | Posterior – Cross-thresholding (Baseline)

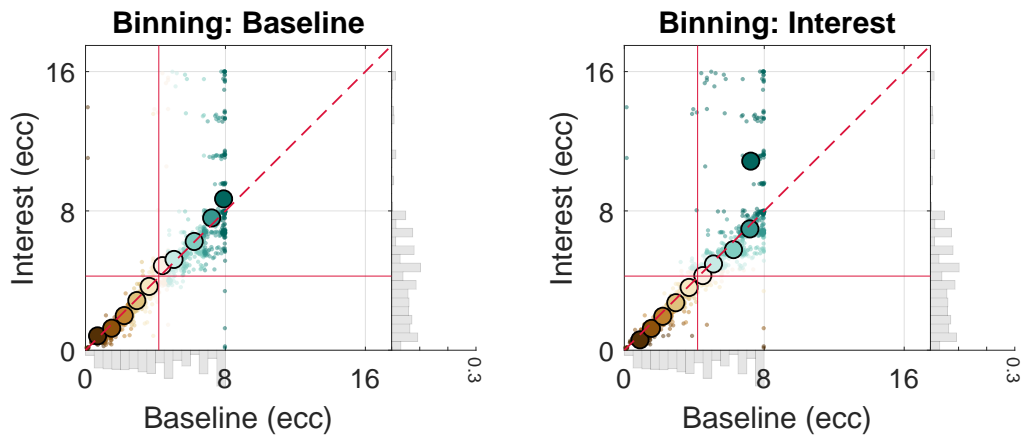

C. Empirical repeat data | 25<sup>th</sup> %ile | Posterior – Cross-thresholding (Baseline and Interest)

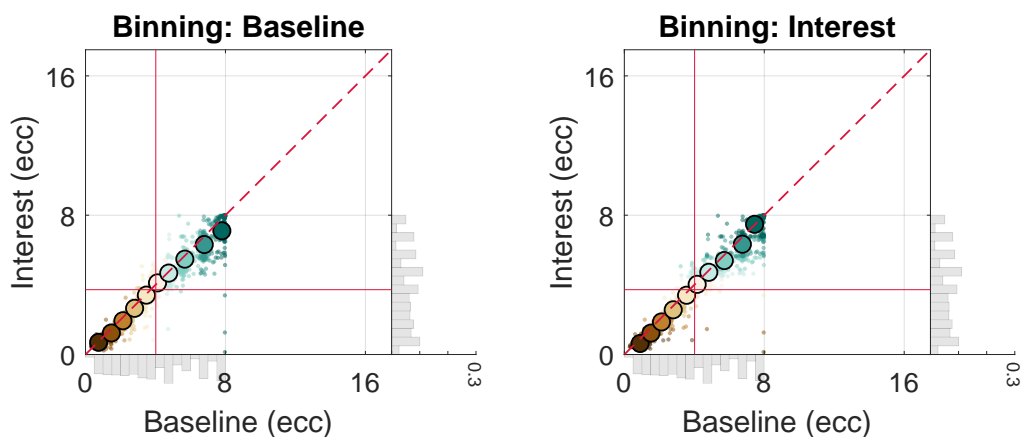

Figure 4-figure supplement 1. **Empirical 1D post hoc binning analysis on eccentricity | Repeat data | 25<sup>th</sup> %ile participant | Posterior.** The same as in Figure 4, although here, we used data from the posterior complex (V1-V3).

A. Empirical repeat data | 75<sup>th</sup> %ile | Dorsal

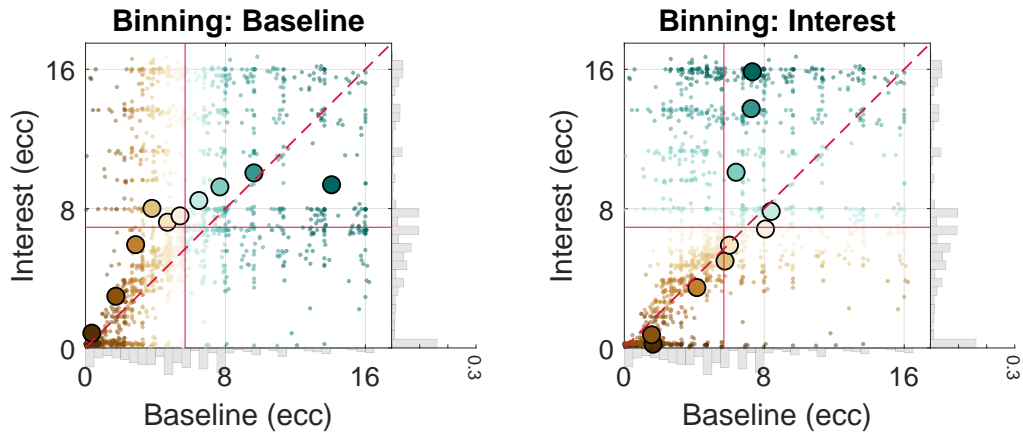

B. Empirical repeat data | 75<sup>th</sup> %ile | Dorsal – Cross-thresholding (Baseline)

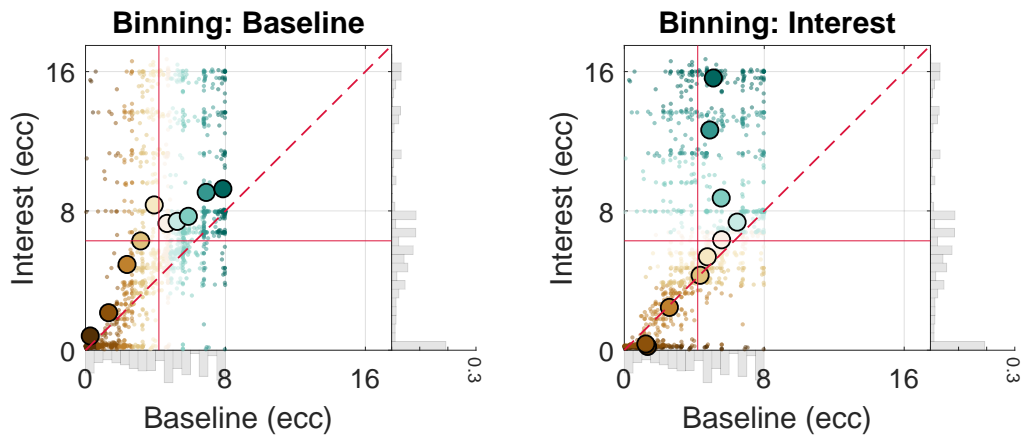

C. Empirical repeat data | 75<sup>th</sup> %ile | Dorsal – Cross-thresholding (Baseline and Interest)

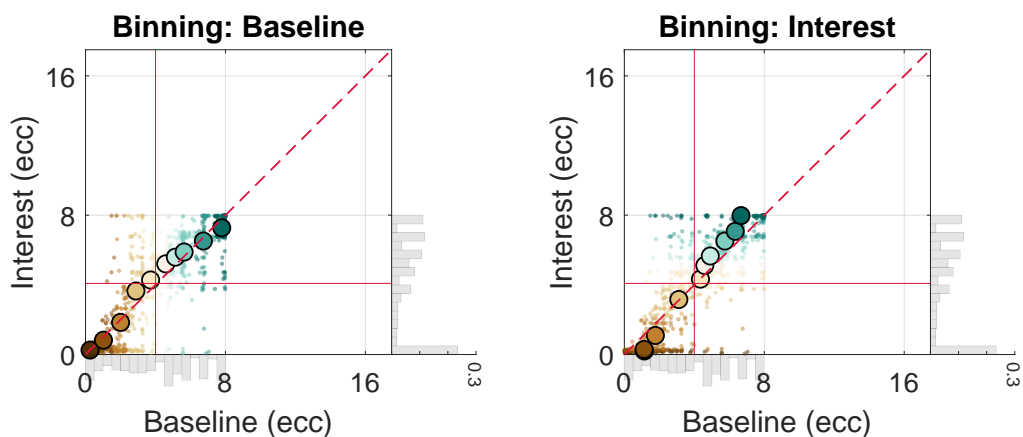

Figure 4-figure supplement 2. Empirical 1D post hoc binning analysis on eccentricity | Repeat data | 75<sup>th</sup> %ile participant | Dorsal. The same as in Figure 4, although here, we used the 75<sup>th</sup> %ile participant of the median  $R^2$  distribution.

A. Empirical repeat data | 75<sup>th</sup> %ile | Posterior

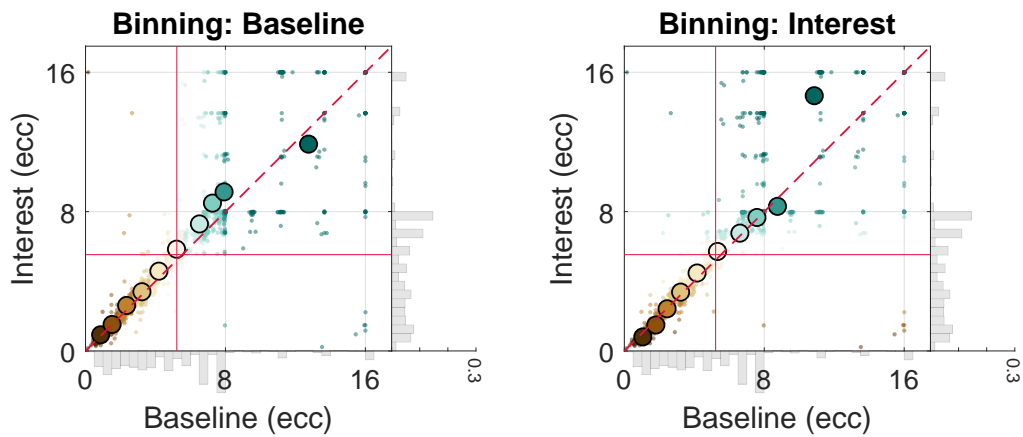

B. Empirical repeat data | 75<sup>th</sup> %ile | Posterior – Cross-thresholding (Baseline)

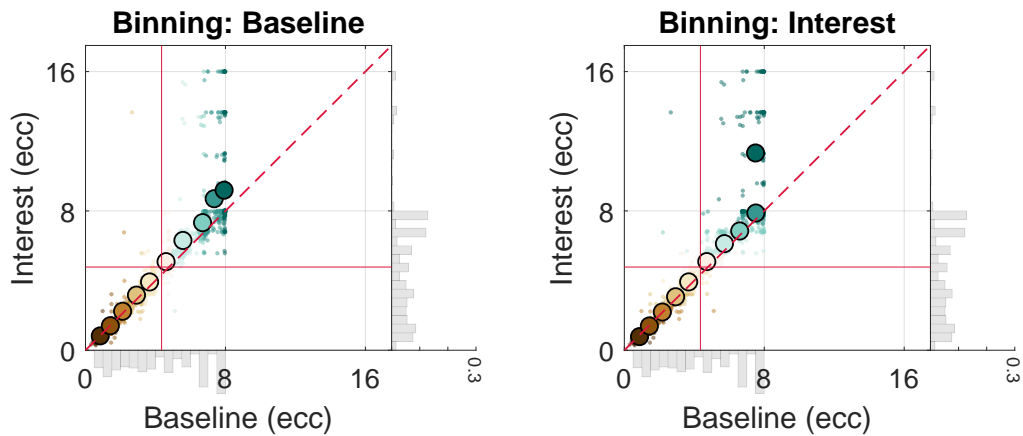

C. Empirical repeat data | 75<sup>th</sup> %ile | Posterior – Cross-thresholding (Baseline and Interest)

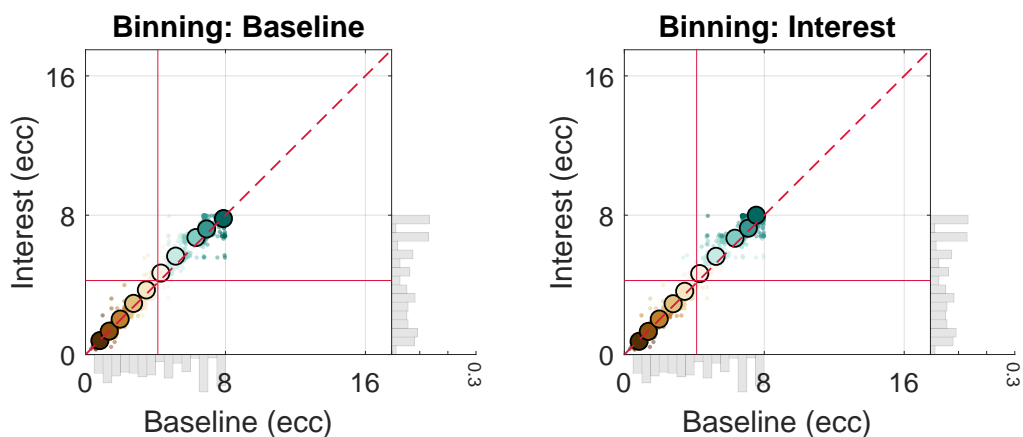

Figure 4-figure supplement 3. **Empirical 1D post hoc binning analysis on eccentricity | Repeat data | 75<sup>th</sup> %ile participant | Posterior.** The same as in [Figure 4-figure supplement 1](#), although here, we used the 75<sup>th</sup> %ile participant of the median  $R^2$  distribution.

A. Empirical repeat data | 25<sup>th</sup> %ile | Posterior

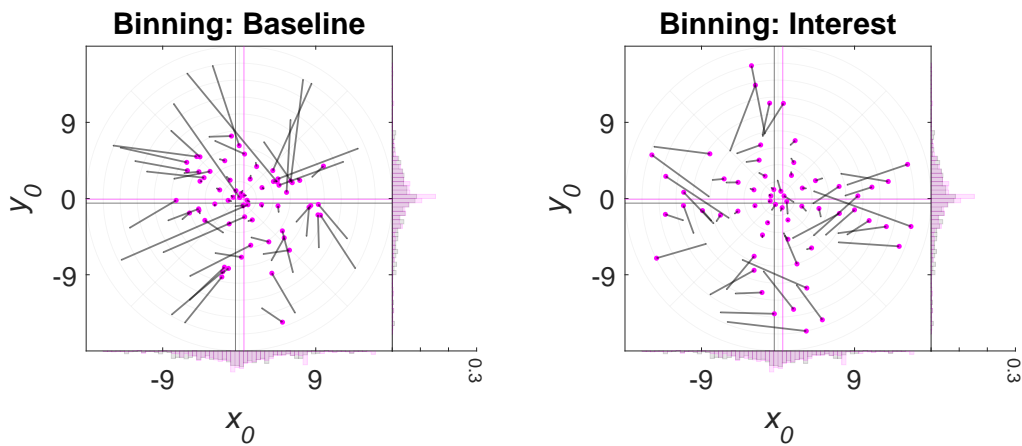

B. Empirical repeat data | 25<sup>th</sup> %ile | Posterior – Cross-thresholding (Baseline)

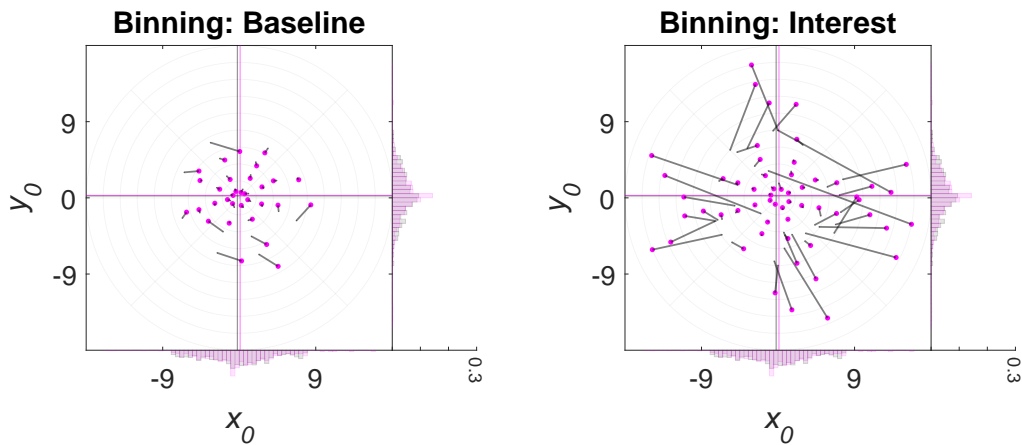

C. Empirical repeat data | 25<sup>th</sup> %ile | Posterior – Cross-thresholding (Baseline and Interest)

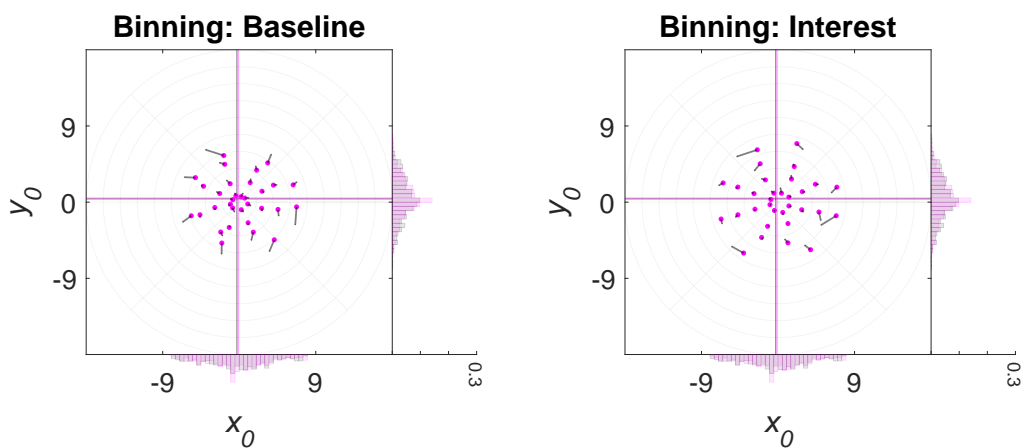

Figure 5-figure supplement 1. Empirical 2D post hoc binning analysis on  $x_0$  and  $y_0$  | Repeat data | 25<sup>th</sup> %ile participant | Posterior. The same as in Figure 5, although here, we used data from the posterior complex (V1-V3).



A. Empirical repeat data | 75<sup>th</sup> %ile | Dorsal

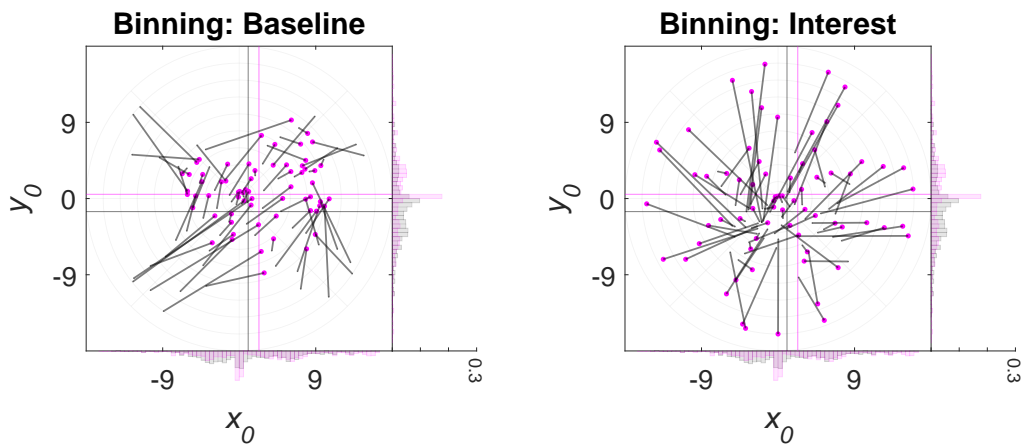

B. Empirical repeat data | 75<sup>th</sup> %ile | Dorsal – Cross-thresholding (Baseline)

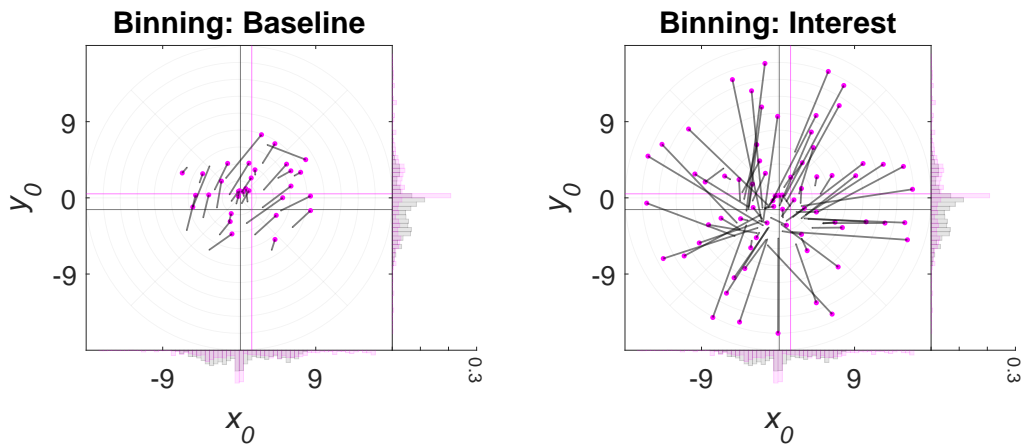

C. Empirical repeat data | 75<sup>th</sup> %ile | Dorsal – Cross-thresholding (Baseline and Interest)

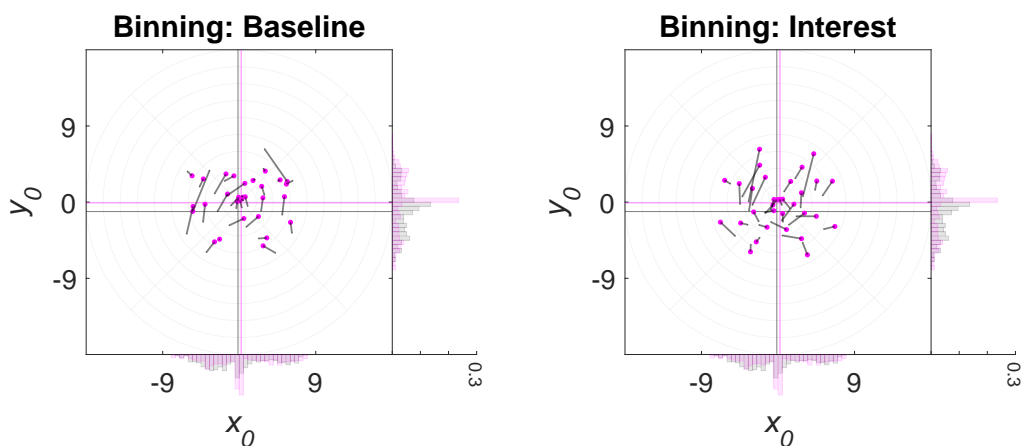

Figure 5-figure supplement 2. Empirical 2D post hoc binning analysis on  $x_0$  and  $y_0$  | Repeat data | 75<sup>th</sup> %ile participant | Dorsal. The same as in Figure 5, although here, we used the 75<sup>th</sup> %ile participant of the median  $R^2$  distribution.

A. Empirical repeat data | 75<sup>th</sup> %ile | Posterior

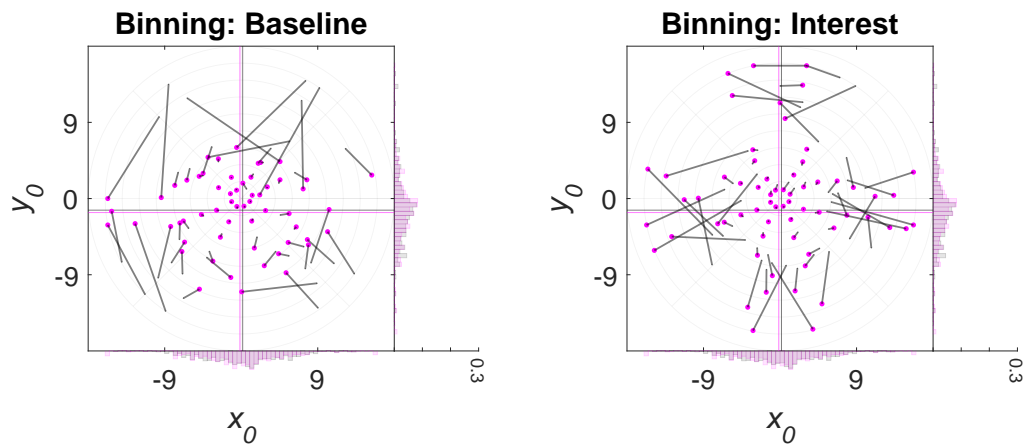

B. Empirical repeat data | 75<sup>th</sup> %ile | Posterior – Cross-thresholding (Baseline)

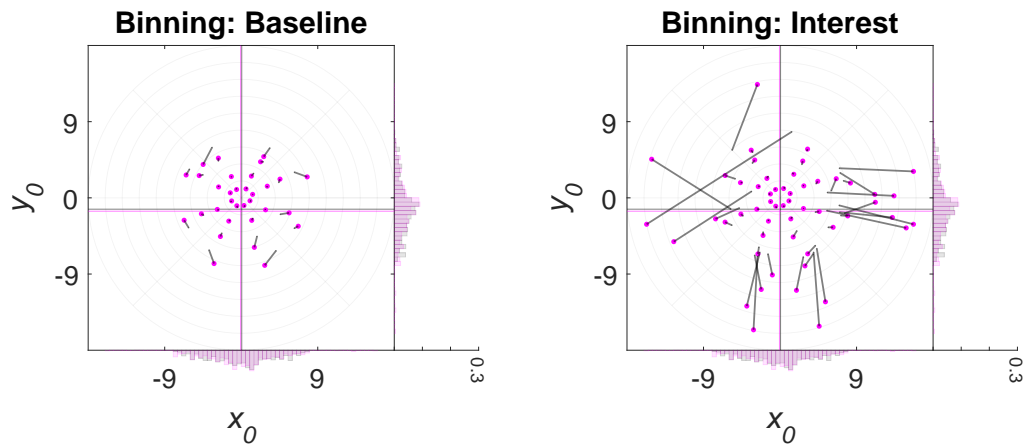

C. Empirical repeat data | 75<sup>th</sup> %ile | Posterior – Cross-thresholding (Baseline and Interest)

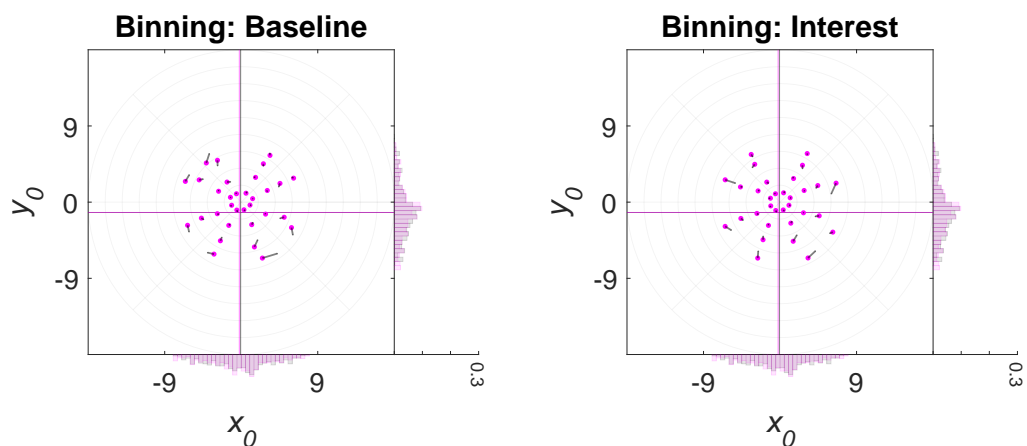

Figure 5-figure supplement 3. Empirical 2D post hoc binning analysis on  $x_0$  and  $y_0$  | Repeat data | 75<sup>th</sup> %ile participant | Posterior. The same as in Figure 5-figure supplement 1, although here, we used the 75<sup>th</sup> %ile participant of the median  $R^2$  distribution.
